# Supplementary material
Source: PubMed Central journal article supplement (PMC5973476)

**Supplemental Tables: Analysis of LT BMC Data Comparing Fancg<sup>-/-</sup> with Fancg<sup>+/-</sup> and Fancg<sup>+/+</sup> and Also Comparing Fanca<sup>-/-</sup> with Fanca<sup>+/-</sup> and Fanca<sup>+/+</sup>.**

LT BMC Data for the weekly cobblestone islands, non-adherent cells per flask, percent confluence, day 7 colonies and day 14 colony forming cells were collected at week 1 through week 27 for Fancg<sup>-/-</sup>, Fancg<sup>+/-</sup>, and Fancg<sup>+/+</sup> in one experiment, and Fanca<sup>-/-</sup>, Fanca<sup>+/-</sup> and Fanca<sup>+/+</sup> mice in another experiment.

At each week, for each of the endpoints (i.e., weekly cobblestone islands, non-adherent cells per flask, percent confluence, day 7 colonies and day 14 colonies), data were collected for all 8 LT BMC culture flasks per group. There were 3 or 4 measurement made at every time point shown as n=4 or n=3 summarized with mean  $\pm$  standard deviation for each of the 8 flasks. At each week, Fancg<sup>+/+</sup> were compared with Fancg<sup>+/-</sup> and Fancg<sup>-/-</sup> groups of flasks, and in another experiment Fanca<sup>+/-</sup> and Fanca<sup>-/-</sup> were compared with Fanca<sup>+/+</sup> groups of flasks, using the one-way ANOVA F-test, followed by Dunnett's multiple comparisons.

The results are in the following Supplemental Tables 1-5 for Fancg<sup>-/-</sup> LT BMCs and controls and on Supplemental Tables 6-10 for Fanca<sup>-/-</sup> LT BMCs and controls on the next pages, Dunnett's multiple comparison test p-values are shown for those weeks where the ANOVA F-test is significant. These p-values are for the comparison of the corresponding group versus the Fanca<sup>+/+</sup> group. For those weeks where the ANOVA F-test is not significant, the three groups did not have a significant difference, and, therefore, the Dunnett's test was not necessary.

**Supplemental Table 1: Analysis of cobblestone islands in Fancg-/- LTBMcs.** Data are summarized with mean  $\pm$  standard deviation, and p-values are for the comparison of the corresponding group versus the Fancg+/+ group using ANOVA followed by Dunnett's tests. For those weeks where the ANOVA F-test is not significant, the three groups don't have significant difference, and Dunnett's tests are not necessary, so p-values are not shown for these weeks.

| group    | Week 1                                 | Week 2                                  | Week 3                      | Week 4                           | Week 5                                 | Week 6                           |
|----------|----------------------------------------|-----------------------------------------|-----------------------------|----------------------------------|----------------------------------------|----------------------------------|
| Fancg+/+ | 527.3 $\pm$ 131.4<br>(n=4)             | 1764.3 $\pm$ 132.7<br>(n=4)             | 1984.0 $\pm$ 458.8<br>(n=4) | 1893.5 $\pm$ 447.8<br>(n=4)      | 1815.5 $\pm$ 461.6<br>(n=4)            | 2053.3 $\pm$ 702.3<br>(n=4)      |
| Fancg+/- | 334.0 $\pm$ 53.4<br>(n=4)<br>p=0.0525  | 1645.0 $\pm$ 130.6<br>(n=4)             | 1818.5 $\pm$ 288.0<br>(n=4) | 1803.3 $\pm$ 132.2<br>(n=4)      | 1788.0 $\pm$ 151.2<br>(n=4)            | 2217.0 $\pm$ 288.6<br>(n=4)      |
| Fancg-/- | 310.0 $\pm$ 116.0<br>(n=4)<br>p=0.0314 | 1610.5 $\pm$ 325.7<br>(n=4)             | 1319.0 $\pm$ 229.7<br>(n=4) | 1409.0 $\pm$ 180.9<br>(n=4)      | 1499.0 $\pm$ 170.5<br>(n=4)            | 1492.5 $\pm$ 69.0<br>(n=4)       |
| group    | Week 7                                 | Week 8                                  | Week 9                      | Week 10                          | Week 11                                | Week 12                          |
| Fancg+/+ | 1860.5 $\pm$ 670.9<br>(n=4)            | 1683.5 $\pm$ 732.7<br>(n=4)             | 1363.0 $\pm$ 948.6<br>(n=4) | 1300.0 $\pm$ 1104.<br>2<br>(n=4) | 1270.3 $\pm$ 933.7<br>(n=4)            | 1344.0 $\pm$ 1026.<br>3<br>(n=4) |
| Fancg+/- | 2082.5 $\pm$ 291.8<br>(n=4)            | 1899.8 $\pm$ 216.8<br>(n=4)<br>p=0.7309 | 1146.5 $\pm$ 320.9<br>(n=4) | 931.5 $\pm$ 364.5<br>(n=4)       | 959.0 $\pm$ 310.1<br>(n=4)             | 996.8 $\pm$ 650.3<br>(n=4)       |
| Fancg-/- | 1355.5 $\pm$ 166.0<br>(n=4)            | 838.0 $\pm$ 170.4<br>(n=4)<br>p=0.0475  | 420.5 $\pm$ 121.1<br>(n=4)  | 251.5 $\pm$ 106.7<br>(n=4)       | 208.3 $\pm$ 41.8<br>(n=4)              | 191.0 $\pm$ 100.8<br>(n=4)       |
| group    | Week 13                                | Week 14                                 | Week 15                     | Week 16                          | Week 17                                | Week 18                          |
| Fancg+/+ | 1105.5 $\pm$ 520.1<br>(n=4)            | 891.0 $\pm$ 417.7<br>(n=4)              | 921.5 $\pm$ 311.1<br>(n=4)  | 975.5 $\pm$ 537.5<br>(n=4)       | 823.0 $\pm$ 502.4<br>(n=4)             | 407.5 $\pm$ 368.1<br>(n=4)       |
| Fancg+/- | 1343.3 $\pm$ 857.6<br>(n=4)            | 1075.0 $\pm$ 744.3<br>(n=4)             | 723.3 $\pm$ 553.4<br>(n=4)  | 803.5 $\pm$ 925.0<br>(n=4)       | 312.0 $\pm$ 354.6<br>(n=4)<br>p=0.1251 | 126.5 $\pm$ 191.8<br>(n=4)       |
| Fancg-/- | 157.5 $\pm$ 78.1<br>(n=4)              | 92.0 $\pm$ 86.6<br>(n=4)                | 387.5 $\pm$ 663.7<br>(n=4)  | 33.5 $\pm$ 23.2<br>(n=4)         | 53.5 $\pm$ 13.9<br>(n=4)<br>p=0.0244   | 117.0 $\pm$ 172.9<br>(n=4)       |
| group    | Week 19                                | Week 20                                 | Week 21                     | Week 22                          | Week 23                                | Week 24                          |
| Fancg+/+ | 293.8 $\pm$ 242.8<br>(n=4)             | 335.0 $\pm$ 419.8<br>(n=4)              | 263.5 $\pm$ 306.0<br>(n=4)  | 117.5 $\pm$ 157.9<br>(n=4)       | 68.5 $\pm$ 71.3<br>(n=4)               | 74.0 $\pm$ 94.8<br>(n=4)         |
| Fancg+/- | 115.0 $\pm$ 162.2<br>(n=4)             | 138.3 $\pm$ 204.2<br>(n=4)              | 214.3 $\pm$ 384.3<br>(n=4)  | 123.0 $\pm$ 149.1<br>(n=4)       | 43.0 $\pm$ 39.7<br>(n=4)               | 12.5 $\pm$ 15.5<br>(n=4)         |
| Fancg-/- | 45.5 $\pm$ 63.2                        | 23.8 $\pm$ 15.3                         | 0.0 $\pm$ 0.0               | 0.0 $\pm$ 0.0                    | 0.0 $\pm$ 0.0                          | 0.0 $\pm$ 0.0                    |

|          | (n=4)              | (n=4)              | (n=4)             | (n=4)                | (n=4)                | (n=4)              |
|----------|--------------------|--------------------|-------------------|----------------------|----------------------|--------------------|
| group    | Week 25            | Week 26            | Week 27           | Week 28              | Week 29              | Week 30            |
| Fancg+/+ | 36.0±46.3<br>(n=4) | 40.5±47.6<br>(n=4) | 8.5±10.1<br>(n=4) | 147.5±259.0<br>(n=4) | 118.5±161.5<br>(n=4) | 18.0±36.0<br>(n=4) |
| Fancg+/- | 6.0±12.0<br>(n=4)  | 0.0±0.0<br>(n=4)   | 0.0±0.0<br>(n=4)  | 0.0±0.0<br>(n=4)     | 0.0±0.0<br>(n=4)     | 0.0±0.0<br>(n=4)   |
| Fancg-/- | 0.0±0.0<br>(n=4)   | 0.0±0.0<br>(n=4)   | 0.0±0.0<br>(n=4)  | 0.0±0.0<br>(n=4)     | 0.0±0.0<br>(n=4)     | 0.0±0.0<br>(n=4)   |
| group    | Week 31            | Week 32            |                   |                      |                      |                    |
| Fancg+/+ | 2.0±4.0<br>(n=4)   | 0.0±0.0<br>(n=4)   |                   |                      |                      |                    |
| Fancg+/- | 0.0±0.0<br>(n=4)   | 0.0±0.0<br>(n=4)   |                   |                      |                      |                    |
| Fancg-/- | 0.0±0.0<br>(n=4)   | 0.0±0.0<br>(n=4)   |                   |                      |                      |                    |

**Supplemental Table 2. Analysis of non-adherent cells per flask from Fancg<sup>-/-</sup> LTBMCS (x 1000000).** Data are summarized with mean  $\pm$  standard deviation, and p-values are for the comparison of the corresponding group versus the Fancg<sup>+/+</sup> group using ANOVA followed by Dunnett's tests. For those weeks where the ANOVA F-test is not significant, the three groups don't have significant difference, and Dunnett's tests are not necessary, so p-values are not shown for these weeks.

| group                | Week 1                             | Week 2                             | Week 3                             | Week 4                 | Week 5                             | Week 6                             |
|----------------------|------------------------------------|------------------------------------|------------------------------------|------------------------|------------------------------------|------------------------------------|
| Fancg <sup>+/+</sup> | 3.0 $\pm$ 0.2<br>(n=4)             | 1.5 $\pm$ 0.5<br>(n=4)             | 1.0 $\pm$ 0.1<br>(n=4)             | 1.5 $\pm$ 0.3<br>(n=4) | 2.2 $\pm$ 1.0<br>(n=4)             | 1.6 $\pm$ 0.5<br>(n=4)             |
| Fancg <sup>+/-</sup> | 2.4 $\pm$ 0.1<br>(n=4)<br>p=0.0114 | 1.7 $\pm$ 0.2<br>(n=4)             | 1.1 $\pm$ 0.2<br>(n=4)             | 1.4 $\pm$ 0.4<br>(n=4) | 1.6 $\pm$ 0.4<br>(n=4)             | 1.4 $\pm$ 0.2<br>(n=4)<br>p=0.5743 |
| Fancg <sup>-/-</sup> | 2.4 $\pm$ 0.3<br>(n=4)<br>p=0.0189 | 1.3 $\pm$ 0.3<br>(n=4)             | 0.8 $\pm$ 0.1<br>(n=4)             | 0.8 $\pm$ 0.3<br>(n=4) | 0.8 $\pm$ 0.1<br>(n=4)             | 0.8 $\pm$ 0.1<br>(n=4)<br>p=0.0136 |
| group                | Week 7                             | Week 8                             | Week 9                             | Week 10                | Week 11                            | Week 12                            |
| Fancg <sup>+/+</sup> | 1.1 $\pm$ 0.2<br>(n=4)             | 0.6 $\pm$ 0.3<br>(n=4)             | 0.7 $\pm$ 0.4<br>(n=4)             | 0.7 $\pm$ 0.4<br>(n=4) | 0.6 $\pm$ 0.3<br>(n=4)             | 0.6 $\pm$ 0.2<br>(n=4)             |
| Fancg <sup>+/-</sup> | 0.9 $\pm$ 0.1<br>(n=4)<br>p=0.1369 | 0.7 $\pm$ 0.1<br>(n=4)<br>p=0.9451 | 0.6 $\pm$ 0.1<br>(n=4)             | 0.5 $\pm$ 0.2<br>(n=4) | 0.5 $\pm$ 0.2<br>(n=4)<br>p=0.8583 | 0.4 $\pm$ 0.2<br>(n=4)<br>p=0.3598 |
| Fancg <sup>-/-</sup> | 0.6 $\pm$ 0.2<br>(n=4)<br>p=0.0025 | 0.3 $\pm$ 0.1<br>(n=4)<br>p=0.0551 | 0.3 $\pm$ 0.1<br>(n=4)             | 0.2 $\pm$ 0.0<br>(n=4) | 0.2 $\pm$ 0.1<br>(n=4)<br>p=0.0203 | 0.2 $\pm$ 0.0<br>(n=4)<br>p=0.0107 |
| group                | Week 13                            | Week 14                            | Week 15                            | Week 16                | Week 17                            | Week 18                            |
| Fancg <sup>+/+</sup> | 0.4 $\pm$ 0.1<br>(n=4)             | 0.3 $\pm$ 0.1<br>(n=4)             | 0.3 $\pm$ 0.1<br>(n=4)             | 0.3 $\pm$ 0.1<br>(n=4) | 0.3 $\pm$ 0.1<br>(n=4)             | 0.2 $\pm$ 0.1<br>(n=4)             |
| Fancg <sup>+/-</sup> | 0.4 $\pm$ 0.2<br>(n=4)<br>p=0.8883 | 0.4 $\pm$ 0.1<br>(n=3)<br>p=0.2719 | 0.4 $\pm$ 0.1<br>(n=3)<br>p=0.4168 | 0.3 $\pm$ 0.2<br>(n=3) | 0.3 $\pm$ 0.2<br>(n=3)             | 0.1 $\pm$ 0.1<br>(n=3)             |
| Fancg <sup>-/-</sup> | 0.1 $\pm$ 0.1<br>(n=4)<br>p=0.0131 | 0.1 $\pm$ 0.0<br>(n=4)<br>p=0.0020 | 0.1 $\pm$ 0.0<br>(n=4)<br>p=0.0253 | 0.1 $\pm$ 0.0<br>(n=4) | 0.1 $\pm$ 0.0<br>(n=4)             | 0.1 $\pm$ 0.0<br>(n=4)             |
| group                | Week 19                            | Week 20                            | Week 21                            | Week 22                | Week 23                            | Week 24                            |
| Fancg <sup>+/+</sup> | 0.1 $\pm$ 0.0<br>(n=4)             | 0.2 $\pm$ 0.1<br>(n=4)             | 0.2 $\pm$ 0.1<br>(n=4)             | 0.1 $\pm$ 0.0<br>(n=4) | 0.1 $\pm$ 0.0<br>(n=3)             | 0.2 $\pm$ 0.0<br>(n=3)             |
| Fancg <sup>+/-</sup> | 0.1 $\pm$ 0.0<br>(n=3)             | 0.2 $\pm$ 0.1<br>(n=3)             | 0.1 $\pm$ 0.0<br>(n=3)             | 0.1 $\pm$ 0.0<br>(n=3) | 0.1 $\pm$ 0.0<br>(n=3)             | 0.1 $\pm$ 0.0<br>(n=3)             |

|                      |                  |                  |                  |                  |                  |                  |
|----------------------|------------------|------------------|------------------|------------------|------------------|------------------|
| Fancg <sup>-/-</sup> | 0.1±0.0<br>(n=4) | 0.1±0.0<br>(n=4) | 0.1±0.0<br>(n=4) | 0.1±0.0<br>(n=4) | 0.1±0.0<br>(n=4) | 0.1±0.0<br>(n=4) |
| <b>group</b>         | <b>Week 25</b>   | <b>Week 26</b>   | <b>Week 27</b>   | <b>Week 28</b>   | <b>Week 29</b>   | <b>Week 30</b>   |
| Fancg <sup>+/+</sup> | 0.2±0.0<br>(n=3) | 0.1±0.0<br>(n=3) | 0.2±0.1<br>(n=3) | 0.2±0.1<br>(n=3) | 0.2±0.1<br>(n=3) | 0.1±0.0<br>(n=3) |
| Fancg <sup>+/-</sup> | 0.2±0.0<br>(n=3) | 0.1±0.0<br>(n=3) | 0.2±0.0<br>(n=3) | 0.2±0.0<br>(n=3) | 0.2±0.0<br>(n=3) | 0.2±0.0<br>(n=3) |
| Fancg <sup>-/-</sup> | 0.2±0.0<br>(n=4) | 0.1±0.0<br>(n=4) | 0.2±0.0<br>(n=4) | 0.1±0.0<br>(n=4) | 0.1±0.0<br>(n=4) | 0.1±0.0<br>(n=4) |
| <b>group</b>         | <b>Week 31</b>   |                  |                  |                  |                  |                  |
| Fancg <sup>+/+</sup> | 0.1±0.0<br>(n=2) |                  |                  |                  |                  |                  |
| Fancg <sup>+/-</sup> | 0.2±0.1<br>(n=3) |                  |                  |                  |                  |                  |
| Fancg <sup>-/-</sup> | 0.1±0.0<br>(n=4) |                  |                  |                  |                  |                  |

### Supplemental Table 3. Analysis of percent confluence in LTBMCs from Fancg<sup>-/-</sup> mice.

Data are summarized with mean  $\pm$  standard deviation, and p-values are for the comparison of the corresponding group versus the Fancg<sup>+/+</sup> group using ANOVA followed by Dunnett's tests. For those weeks where the ANOVA F-test is not significant, the three groups don't have significant difference, and Dunnett's tests are not necessary, so p-values are not shown for these weeks.

| group                | Week 1                  | Week 2                              | Week 3                  | Week 4                  | Week 5                  | Week 6                  |
|----------------------|-------------------------|-------------------------------------|-------------------------|-------------------------|-------------------------|-------------------------|
| Fancg <sup>+/+</sup> | 30.0 $\pm$ 4.1<br>(n=4) | 79.4 $\pm$ 1.2<br>(n=4)             | 82.5 $\pm$ 2.0<br>(n=4) | 85.0 $\pm$ 0.0<br>(n=4) | 85.0 $\pm$ 0.0<br>(n=4) | 95.0 $\pm$ 0.0<br>(n=4) |
| Fancg <sup>+/-</sup> | 27.5 $\pm$ 0.0<br>(n=4) | 68.1 $\pm$ 7.5<br>(n=4)<br>p=0.0155 | 80.0 $\pm$ 4.6<br>(n=4) | 85.0 $\pm$ 0.0<br>(n=4) | 85.0 $\pm$ 0.0<br>(n=4) | 95.0 $\pm$ 0.0<br>(n=4) |
| Fancg <sup>-/-</sup> | 26.9 $\pm$ 1.2<br>(n=4) | 71.3 $\pm$ 3.2<br>(n=4)<br>p=0.0683 | 80.0 $\pm$ 2.0<br>(n=4) | 85.0 $\pm$ 0.0<br>(n=4) | 85.0 $\pm$ 0.0<br>(n=4) | 95.0 $\pm$ 0.0<br>(n=4) |
| group                | Week 7                  | Week 8                              | Week 9                  | Week 10                 | Week 11                 | Week 12                 |
| Fancg <sup>+/+</sup> | 95.0 $\pm$ 0.0<br>(n=4) | 95.0 $\pm$ 0.0<br>(n=4)             | 95.0 $\pm$ 0.0<br>(n=4) | 95.0 $\pm$ 0.0<br>(n=4) | 95.0 $\pm$ 0.0<br>(n=4) | 95.0 $\pm$ 0.0<br>(n=4) |
| Fancg <sup>+/-</sup> | 95.0 $\pm$ 0.0<br>(n=4) | 95.0 $\pm$ 0.0<br>(n=4)             | 95.0 $\pm$ 0.0<br>(n=4) | 95.0 $\pm$ 0.0<br>(n=4) | 95.0 $\pm$ 0.0<br>(n=4) | 95.0 $\pm$ 0.0<br>(n=4) |
| Fancg <sup>-/-</sup> | 95.0 $\pm$ 0.0<br>(n=4) | 95.0 $\pm$ 0.0<br>(n=4)             | 95.0 $\pm$ 0.0<br>(n=4) | 95.0 $\pm$ 0.0<br>(n=4) | 95.0 $\pm$ 0.0<br>(n=4) | 95.0 $\pm$ 0.0<br>(n=4) |
| group                | Week 13                 | Week 14                             | Week 15                 | Week 16                 | Week 17                 | Week 18                 |
| Fancg <sup>+/+</sup> | 95.0 $\pm$ 0.0<br>(n=4) | 95.0 $\pm$ 0.0<br>(n=4)             | 95.0 $\pm$ 0.0<br>(n=4) | 95.0 $\pm$ 0.0<br>(n=4) | 95.0 $\pm$ 0.0<br>(n=4) | 95.0 $\pm$ 0.0<br>(n=4) |
| Fancg <sup>+/-</sup> | 95.0 $\pm$ 0.0<br>(n=4) | 95.0 $\pm$ 0.0<br>(n=3)             | 95.0 $\pm$ 0.0<br>(n=3) | 95.0 $\pm$ 0.0<br>(n=3) | 95.0 $\pm$ 0.0<br>(n=3) | 95.0 $\pm$ 0.0<br>(n=3) |
| Fancg <sup>-/-</sup> | 95.0 $\pm$ 0.0<br>(n=4) | 95.0 $\pm$ 0.0<br>(n=4)             | 95.0 $\pm$ 0.0<br>(n=4) | 95.0 $\pm$ 0.0<br>(n=4) | 95.0 $\pm$ 0.0<br>(n=4) | 95.0 $\pm$ 0.0<br>(n=4) |
| group                | Week 19                 | Week 20                             | Week 21                 | Week 22                 | Week 23                 | Week 24                 |
| Fancg <sup>+/+</sup> | 95.0 $\pm$ 0.0<br>(n=4) | 95.0 $\pm$ 0.0<br>(n=4)             | 95.0 $\pm$ 0.0<br>(n=4) | 95.0 $\pm$ 0.0<br>(n=4) | 95.0 $\pm$ 0.0<br>(n=3) | 95.0 $\pm$ 0.0<br>(n=3) |
| Fancg <sup>+/-</sup> | 95.0 $\pm$ 0.0<br>(n=3) | 95.0 $\pm$ 0.0<br>(n=3)             | 95.0 $\pm$ 0.0<br>(n=3) | 95.0 $\pm$ 0.0<br>(n=3) | 95.0 $\pm$ 0.0<br>(n=3) | 95.0 $\pm$ 0.0<br>(n=3) |
| Fancg <sup>-/-</sup> | 95.0 $\pm$ 0.0<br>(n=4) | 95.0 $\pm$ 0.0<br>(n=4)             | 95.0 $\pm$ 0.0<br>(n=4) | 95.0 $\pm$ 0.0<br>(n=4) | 95.0 $\pm$ 0.0<br>(n=4) | 95.0 $\pm$ 0.0<br>(n=4) |
| group                | Week 25                 | Week 26                             | Week 27                 | Week 28                 | Week 29                 | Week 30                 |
| Fancg <sup>+/+</sup> | 95.0 $\pm$ 0.0<br>(n=3) | 95.0 $\pm$ 0.0<br>(n=3)             | 95.0 $\pm$ 0.0<br>(n=3) | 95.0 $\pm$ 0.0<br>(n=3) | 95.0 $\pm$ 0.0<br>(n=3) | 95.0 $\pm$ 0.0<br>(n=3) |

|              |                   |                   |                   |                   |                   |                   |
|--------------|-------------------|-------------------|-------------------|-------------------|-------------------|-------------------|
| Fancg+/-     | 95.0±0.0<br>(n=3) | 95.0±0.0<br>(n=3) | 95.0±0.0<br>(n=3) | 95.0±0.0<br>(n=3) | 95.0±0.0<br>(n=3) | 95.0±0.0<br>(n=3) |
| Fancg-/-     | 95.0±0.0<br>(n=4) | 95.0±0.0<br>(n=4) | 95.0±0.0<br>(n=4) | 95.0±0.0<br>(n=4) | 95.0±0.0<br>(n=4) | 95.0±0.0<br>(n=4) |
| <b>group</b> | <b>Week 31</b>    | <b>Week 32</b>    |                   |                   |                   |                   |
| Fancg+/+     | 95.0±0.0<br>(n=3) | 95.0±0.0<br>(n=3) |                   |                   |                   |                   |
| Fancg+/-     | 95.0±0.0<br>(n=3) | 95.0±0.0<br>(n=3) |                   |                   |                   |                   |
| Fancg-/-     | 95.0±0.0<br>(n=4) | 95.0±0.0<br>(n=4) |                   |                   |                   |                   |

### Supplemental Table 4. Analysis of day 7 colony forming progenitor cells from Fancg<sup>-/-</sup>

LTBMCs. Data are summarized with mean  $\pm$  standard deviation, and p-values are for the comparison of the corresponding group versus the Fancg<sup>+/+</sup> group using ANOVA followed by Dunnett's tests. For those weeks where the ANOVA F-test is not significant, the three groups don't have significant difference, and Dunnett's tests are not necessary, so p-values are not shown for these weeks.

| group                | Week 1                               | Week 2                              | Week 3                               | Week 4                               | Week 5                              | Week 6                              |
|----------------------|--------------------------------------|-------------------------------------|--------------------------------------|--------------------------------------|-------------------------------------|-------------------------------------|
| Fancg <sup>+/+</sup> | 104.7 $\pm$ 7.0<br>(n=3)             | 35.3 $\pm$ 3.1<br>(n=3)             | 166.0 $\pm$ 5.0<br>(n=3)             | 198.3 $\pm$ 7.5<br>(n=3)             | 114.0 $\pm$ 6.0<br>(n=3)            | 93.0 $\pm$ 6.0<br>(n=3)             |
| Fancg <sup>+/-</sup> | 145.7 $\pm$ 4.5<br>(n=3)<br>p=0.0002 | 67.7 $\pm$ 6.5<br>(n=3)<br>p=0.0004 | 184.3 $\pm$ 8.7<br>(n=3)<br>p=0.0259 | 160.3 $\pm$ 5.5<br>(n=3)<br>p=0.0004 | 115.3 $\pm$ 5.5<br>(n=3)            | 65.7 $\pm$ 4.5<br>(n=3)<br>p=0.0010 |
| Fancg <sup>-/-</sup> | 61.3 $\pm$ 4.7<br>(n=3)<br>p=0.0001  | 28.7 $\pm$ 5.0<br>(n=3)<br>p=0.2587 | 47.7 $\pm$ 5.5<br>(n=3)<br>p<0.0001  | 90.3 $\pm$ 4.0<br>(n=3)<br>p<0.0001  | 118.7 $\pm$ 6.5<br>(n=3)            | 66.7 $\pm$ 4.5<br>(n=3)<br>p=0.0013 |
| group                | Week 7                               | Week 8                              | Week 9                               | Week 10                              | Week 11                             | Week 12                             |
| Fancg <sup>+/+</sup> | 48.7 $\pm$ 4.5<br>(n=3)              | 40.0 $\pm$ 3.0<br>(n=3)             | 24.0 $\pm$ 4.0<br>(n=3)              | 17.3 $\pm$ 3.5<br>(n=3)              | 26.0 $\pm$ 3.0<br>(n=3)             | 22.7 $\pm$ 2.5<br>(n=3)             |
| Fancg <sup>+/-</sup> | 67.7 $\pm$ 4.5<br>(n=3)<br>p=0.0026  | 32.7 $\pm$ 4.5<br>(n=3)<br>p=0.0902 | 36.0 $\pm$ 4.0<br>(n=3)<br>p=0.0130  | 44.0 $\pm$ 5.0<br>(n=3)<br>p=0.0004  | 43.7 $\pm$ 3.5<br>(n=3)<br>p=0.0009 | 31.0 $\pm$ 4.0<br>(n=3)<br>p=0.0288 |
| Fancg <sup>-/-</sup> | 27.3 $\pm$ 3.5<br>(n=3)<br>p=0.0014  | 23.7 $\pm$ 3.5<br>(n=3)<br>p=0.0031 | 16.0 $\pm$ 3.0<br>(n=3)<br>p=0.0658  | 12.0 $\pm$ 4.0<br>(n=3)<br>p=0.2803  | 24.0 $\pm$ 3.0<br>(n=3)<br>p=0.6770 | 18.7 $\pm$ 2.5<br>(n=3)<br>p=0.2678 |
| group                | Week 13                              | Week 14                             | Week 15                              | Week 16                              | Week 17                             | Week 18                             |
| Fancg <sup>+/+</sup> | 9.3 $\pm$ 2.5<br>(n=3)               | 20.0 $\pm$ 2.0<br>(n=3)             | 17.3 $\pm$ 3.5<br>(n=3)              | 15.0 $\pm$ 3.0<br>(n=3)              | 3.0 $\pm$ 1.0<br>(n=3)              | 7.0 $\pm$ 2.0<br>(n=3)              |
| Fancg <sup>+/-</sup> | 14.3 $\pm$ 2.5<br>(n=3)<br>p=0.0587  | 23.0 $\pm$ 4.0<br>(n=3)<br>p=0.3334 | 8.7 $\pm$ 1.2<br>(n=3)<br>p=0.0054   | 5.3 $\pm$ 1.5<br>(n=3)<br>p=0.0100   | 6.3 $\pm$ 1.5<br>(n=3)<br>p=0.4209  | 6.0 $\pm$ 2.0<br>(n=3)<br>p=0.7453  |
| Fancg <sup>-/-</sup> | 6.3 $\pm$ 1.5<br>(n=3)<br>p=0.2484   | 3.7 $\pm$ 0.6<br>(n=3)<br>p=0.0005  | 5.0 $\pm$ 1.0<br>(n=3)<br>p=0.0009   | 25.7 $\pm$ 3.5<br>(n=3)<br>p=0.0063  | 61.7 $\pm$ 5.5<br>(n=3)<br>p<0.0001 | 2.3 $\pm$ 1.5<br>(n=3)<br>p=0.0380  |
| group                | Week 19                              | Week 20                             | Week 21                              | Week 22                              | Week 23                             | Week 24                             |
| Fancg <sup>+/+</sup> | 9.0 $\pm$ 2.0<br>(n=3)               | 8.3 $\pm$ 1.5<br>(n=3)              | 0.7 $\pm$ 0.6<br>(n=3)               | 1.3 $\pm$ 0.6<br>(n=3)               | 0.0 $\pm$ 0.0<br>(n=3)              | 0.7 $\pm$ 1.2<br>(n=3)              |
| Fancg <sup>+/-</sup> | 4.0 $\pm$ 1.0<br>(n=3)               | 15.0 $\pm$ 3.0<br>(n=3)             | 3.0 $\pm$ 1.0<br>(n=3)               | 1.7 $\pm$ 1.5<br>(n=3)               | 0.3 $\pm$ 0.6<br>(n=3)              | 4.7 $\pm$ 0.6<br>(n=3)              |



|                      |                               |                               |                  |                  |           |           |
|----------------------|-------------------------------|-------------------------------|------------------|------------------|-----------|-----------|
|                      | p=0.0057                      | p=0.0265*                     | p=0.0249*        | p=0.7415*        | p=0.4226* | p=0.0058* |
| Fancg <sup>-/-</sup> | 0.0±0.0<br>(n=3)<br>p=0.0003  | No data                       | No data          | No data          | No data   | No data   |
| group                | <b>Week 25</b>                | <b>Week 26</b>                | <b>Week 27</b>   | <b>Week 28</b>   |           |           |
| Fancg <sup>+/+</sup> | 3.0±1.0<br>(n=3)              | 21.7±4.5<br>(n=3)             | 3.7±1.5<br>(n=3) | 0.0±0.0<br>(n=3) |           |           |
| Fancg <sup>+/-</sup> | 3.7±0.6<br>(n=3)<br>p=0.3739* | 3.0±1.0<br>(n=3)<br>p=0.0022* | No data          | No data          |           |           |
| Fancg <sup>-/-</sup> | No data                       | No data                       | No data          | No data          |           |           |

\*These p-values were calculated with t-tests as there were no data in the Fancg<sup>-/-</sup> group.

**Supplemental Table 5. Analysis of day 14 colony forming progenitor cells from Fancg<sup>-/-</sup>**

**LTBMCs.** Data are summarized with mean  $\pm$  standard deviation, and p-values are for the comparison of the corresponding group versus the Fancg<sup>+/+</sup> group using ANOVA followed by Dunnett's tests. For those weeks where the ANOVA F-test is not significant, the three groups don't have significant difference, and Dunnett's tests are not necessary, so p-values are not shown for these weeks.

| group                | Week 1                                | Week 2                                | Week 3                               | Week 4                               | Week 5                               | Week 6                               |
|----------------------|---------------------------------------|---------------------------------------|--------------------------------------|--------------------------------------|--------------------------------------|--------------------------------------|
| Fancg <sup>+/+</sup> | 359.0 $\pm$ 9.5<br>(n=3)              | 148.7 $\pm$ 5.0<br>(n=3)              | 422.7 $\pm$ 7.0<br>(n=3)             | 608.0 $\pm$ 7.5<br>(n=3)             | 531.7 $\pm$ 8.0<br>(n=3)             | 310.7 $\pm$ 6.5<br>(n=3)             |
| Fancg <sup>+/-</sup> | 388.0 $\pm$ 18.1<br>(n=3)<br>p=0.0510 | 410.7 $\pm$ 17.2<br>(n=3)<br>p<0.0001 | 472.7 $\pm$ 6.0<br>(n=3)<br>p=0.0001 | 522.3 $\pm$ 8.3<br>(n=3)<br>p<0.0001 | 399.0 $\pm$ 8.0<br>(n=3)<br>p<0.0001 | 242.3 $\pm$ 7.0<br>(n=3)<br>p<0.0001 |
| Fancg <sup>-/-</sup> | 142.0 $\pm$ 7.0<br>(n=3)<br>p<0.0001  | 87.7 $\pm$ 5.5<br>(n=3)<br>p=0.0008   | 127.0 $\pm$ 5.0<br>(n=3)<br>p<0.0001 | 212.0 $\pm$ 7.5<br>(n=3)<br>p<0.0001 | 152.7 $\pm$ 6.5<br>(n=3)<br>p<0.0001 | 103.0 $\pm$ 6.0<br>(n=3)<br>p<0.0001 |
| group                | Week 7                                | Week 8                                | Week 9                               | Week 10                              | Week 11                              | Week 12                              |
| Fancg <sup>+/+</sup> | 366.3 $\pm$ 5.5<br>(n=3)              | 285.3 $\pm$ 4.5<br>(n=3)              | 128.3 $\pm$ 6.0<br>(n=3)             | 114.7 $\pm$ 6.0<br>(n=3)             | 126.3 $\pm$ 4.5<br>(n=3)             | 100.3 $\pm$ 6.0<br>(n=3)             |
| Fancg <sup>+/-</sup> | 266.0 $\pm$ 7.0<br>(n=3)<br>p<0.0001  | 171.0 $\pm$ 5.0<br>(n=3)<br>p<0.0001  | 114.0 $\pm$ 7.5<br>(n=3)<br>p=0.0472 | 123.3 $\pm$ 4.5<br>(n=3)<br>p=0.1271 | 176.3 $\pm$ 5.5<br>(n=3)<br>p<0.0001 | 161.3 $\pm$ 7.5<br>(n=3)<br>p<0.0001 |
| Fancg <sup>-/-</sup> | 86.0 $\pm$ 5.0<br>(n=3)<br>p<0.0001   | 41.7 $\pm$ 2.1<br>(n=3)<br>p<0.0001   | 33.0 $\pm$ 4.0<br>(n=3)<br>p<0.0001  | 24.7 $\pm$ 4.0<br>(n=3)<br>p<0.0001  | 72.0 $\pm$ 4.0<br>(n=3)<br>p<0.0001  | 54.7 $\pm$ 4.5<br>(n=3)<br>p=0.0002  |
| group                | Week 13                               | Week 14                               | Week 15                              | Week 16                              | Week 17                              | Week 18                              |
| Fancg <sup>+/+</sup> | 91.7 $\pm$ 5.5<br>(n=3)               | 123.3 $\pm$ 5.1<br>(n=3)              | 142.0 $\pm$ 6.6<br>(n=3)             | 132.0 $\pm$ 5.6<br>(n=3)             | 38.0 $\pm$ 3.0<br>(n=3)              | 157.3 $\pm$ 6.5<br>(n=3)             |
| Fancg <sup>+/-</sup> | 75.0 $\pm$ 5.6<br>(n=3)<br>p=0.0205   | 97.3 $\pm$ 6.1<br>(n=3)<br>p=0.0012   | 51.7 $\pm$ 6.0<br>(n=3)<br>p<0.0001  | 49.3 $\pm$ 3.5<br>(n=3)<br>p<0.0001  | 26.0 $\pm$ 3.0<br>(n=3)<br>p=0.0369  | 64.7 $\pm$ 4.5<br>(n=3)<br>p<0.0001  |
| Fancg <sup>-/-</sup> | 58.0 $\pm$ 6.0<br>(n=3)<br>p=0.0006   | 21.0 $\pm$ 3.0<br>(n=3)<br>p<0.0001   | 21.3 $\pm$ 3.1<br>(n=3)<br>p<0.0001  | 73.3 $\pm$ 5.5<br>(n=3)<br>p<0.0001  | 97.3 $\pm$ 7.0<br>(n=3)<br>p<0.0001  | 5.3 $\pm$ 1.2<br>(n=3)<br>p<0.0001   |
| group                | Week 19                               | Week 20                               | Week 21                              | Week 22                              | Week 23                              | Week 24                              |
| Fancg <sup>+/+</sup> | 112.0 $\pm$ 4.0<br>(n=3)              | 119.7 $\pm$ 5.1<br>(n=3)              | 15.0 $\pm$ 3.0<br>(n=3)              | 41.0 $\pm$ 4.0<br>(n=3)              | 12.0 $\pm$ 2.0<br>(n=3)              | 25.7 $\pm$ 2.5<br>(n=3)              |
| Fancg <sup>+/-</sup> | 26.0 $\pm$ 3.0                        | 45.0 $\pm$ 6.1                        | 18.7 $\pm$ 2.5                       | 12.0 $\pm$ 2.0                       | 3.0 $\pm$ 1.0                        | 52.3 $\pm$ 4.0                       |

|              |                                |                                |                    |                    |                    |                    |
|--------------|--------------------------------|--------------------------------|--------------------|--------------------|--------------------|--------------------|
|              | (n=3)<br>p<0.0001              | (n=3)<br>p<0.0001*             | (n=3)<br>p=0.1802* | (n=3)<br>p=0.0004* | (n=3)<br>p=0.0022* | (n=3)<br>p=0.0006* |
| Fancg-/-     | 0.0±0.0<br>(n=3)<br>p<0.0001   | No data                        | No data            | No data            | No data            | No data            |
| <b>group</b> | <b>Week 25</b>                 | <b>Week 26</b>                 | <b>Week 27</b>     | <b>Week 28</b>     | <b>Week 29</b>     |                    |
| Fancg+/+     | 22.3±4.0<br>(n=3)              | 68.3±6.0<br>(n=3)              | 72.3±5.5<br>(n=3)  | 6.0±2.0<br>(n=3)   | 3.0±1.0<br>(n=3)   |                    |
| Fancg+/-     | 21.3±4.0<br>(n=3)<br>p=0.7770* | 34.3±4.0<br>(n=3)<br>p=0.0013* | No data            | No data            | No data            |                    |
| Fancg-/-     | No data                        | No data                        | No data            | No data            | No data            |                    |

\*These p-values were calculated with t-tests as there were no data in the Fancg-/- group.

**Supplemental Table 6: Analysis of cobblestone islands in Fanca-/- LTBMcs.** Data are summarized with mean  $\pm$  standard deviation, and p-values are for the comparison of the corresponding group versus the Fanca+/+ group using ANOVA followed by Dunnett's tests. For those weeks where the ANOVA F-test is not significant, the three groups don't have significant difference, and Dunnett's tests are not necessary, so p-values are not shown for these weeks.

| group    | Week 1                                 | Week 2                                 | Week 3                                 | Week 4                               | Week 5                                | Week 6                                 |
|----------|----------------------------------------|----------------------------------------|----------------------------------------|--------------------------------------|---------------------------------------|----------------------------------------|
| Fanca+/+ | 13.5 $\pm$ 1.3<br>(n=4)                | 416.0 $\pm$ 98.4<br>(n=4)              | 352.5 $\pm$ 103.0<br>(n=4)             | 103.3 $\pm$ 14.5<br>(n=4)            | 140.0 $\pm$ 44.7<br>(n=4)             | 413.0 $\pm$ 166.9<br>(n=4)             |
| Fanca+/- | 5.3 $\pm$ 2.2<br>(n=4)<br>p=0.0004     | 39.0 $\pm$ 21.3<br>(n=4)<br>p<0.0001   | 57.5 $\pm$ 15.2<br>(n=4)<br>p=0.0001   | 28.5 $\pm$ 9.1<br>(n=4)<br>p<0.0001  | 85.0 $\pm$ 38.0<br>(n=4)<br>p=0.0895  | 248.0 $\pm$ 89.6<br>(n=4)              |
| Fanca-/- | 2.0 $\pm$ 2.2<br>(n=4)<br>p<0.0001     | 28.5 $\pm$ 29.6<br>(n=4)<br>p<0.0001   | 24.5 $\pm$ 14.7<br>(n=4)<br>p=0.0001   | 15.0 $\pm$ 15.7<br>(n=4)<br>p<0.0001 | 34.0 $\pm$ 12.1<br>(n=4)<br>p=0.0035  | 171.0 $\pm$ 107.4<br>(n=4)             |
| group    | Week 7                                 | Week 8                                 | Week 9                                 | Week 10                              | Week 11                               | Week 12                                |
| Fanca+/+ | 340.5 $\pm$ 99.4<br>(n=4)              | 249.0 $\pm$ 102.5<br>(n=4)             | 166.0 $\pm$ 90.1<br>(n=4)              | 202.5 $\pm$ 141.2<br>(n=4)           | 236.0 $\pm$ 118.6<br>(n=4)            | 314.5 $\pm$ 138.8<br>(n=4)             |
| Fanca+/- | 476.0 $\pm$ 87.7<br>(n=4)<br>p=0.1271  | 532.5 $\pm$ 208.2<br>(n=4)<br>p=0.0275 | 162.5 $\pm$ 94.8<br>(n=4)<br>p=0.9968  | 134.0 $\pm$ 112.5<br>(n=4)           | 150.5 $\pm$ 83.7<br>(n=4)<br>p=0.3004 | 158.5 $\pm$ 119.9<br>(n=4)<br>p=0.1160 |
| Fanca-/- | 144.3 $\pm$ 96.5<br>(n=4)<br>p=0.0300  | 17.5 $\pm$ 14.6<br>(n=4)<br>p=0.0661   | 0.0 $\pm$ 0.0<br>(n=4)<br>p=0.0227     | 0.0 $\pm$ 0.0<br>(n=4)               | 0.0 $\pm$ 0.0<br>(n=4)<br>p=0.0059    | 0.0 $\pm$ 0.0<br>(n=4)<br>p=0.0043     |
| group    | Week 13                                | Week 14                                | Week 15                                | Week 16                              | Week 17                               | Week 18                                |
| Fanca+/+ | 290.5 $\pm$ 77.8<br>(n=4)              | 354.0 $\pm$ 219.5<br>(n=4)             | 340.0 $\pm$ 226.9<br>(n=4)             | 274.5 $\pm$ 179.6<br>(n=4)           | 216.8 $\pm$ 150.2<br>(n=4)            | 224.0 $\pm$ 192.7<br>(n=4)             |
| Fanca+/- | 159.6 $\pm$ 128.9<br>(n=4)<br>p=0.1079 | 126.0 $\pm$ 99.7<br>(n=4)<br>p=0.0803  | 104.8 $\pm$ 102.2<br>(n=4)<br>p=0.0805 | 92.5 $\pm$ 93.6<br>(n=4)<br>p=0.0964 | 83.0 $\pm$ 116.7<br>(n=4)             | 89.5 $\pm$ 137.7<br>(n=4)              |
| Fanca-/- | 0.0 $\pm$ 0.0<br>(n=4)<br>p=0.0020     | 0.0 $\pm$ 0.0<br>(n=4)<br>p=0.0106     | 0.0 $\pm$ 0.0<br>(n=4)<br>p=0.0156     | 0.0 $\pm$ 0.0<br>(n=4)<br>p=0.0163   | 0.0 $\pm$ 0.0<br>(n=4)                | 0.0 $\pm$ 0.0<br>(n=4)                 |
| group    | Week 19                                | Week 20                                | Week 21                                | Week 22                              | Week 23                               | Week 24                                |
| Fanca+/+ | 236.5 $\pm$ 153.9<br>(n=4)             | 263.3 $\pm$ 207.7<br>(n=4)             | 244.5 $\pm$ 204.3<br>(n=4)             | 232.0 $\pm$ 175.9<br>(n=4)           | 284.5 $\pm$ 186.9<br>(n=4)            | 303.5 $\pm$ 225.2<br>(n=4)             |
| Fanca+/- | 69.0 $\pm$ 111.6<br>(n=4)<br>p=0.1032  | 56.0 $\pm$ 81.5<br>(n=4)<br>p=0.0858   | 22.0 $\pm$ 28.6<br>(n=4)<br>p=0.0478   | 9.8 $\pm$ 5.3<br>(n=4)<br>p=0.0232   | 9.0 $\pm$ 7.4<br>(n=4)<br>p=0.0104    | 6.0 $\pm$ 6.9<br>(n=4)<br>p=0.0186     |
| Fanca-/- | 0.0 $\pm$ 0.0                          | 0.0 $\pm$ 0.0                          | 0.0 $\pm$ 0.0                          | 0.0 $\pm$ 0.0                        | 0.0 $\pm$ 0.0                         | 0.0 $\pm$ 0.0                          |

|          | (n=4)<br>p=0.0250            | (n=4)<br>p=0.0322            | (n=4)<br>p=0.0315            | (n=4)<br>p=0.0187 | (n=4)<br>p=0.0087 | (n=4)<br>p=0.0168 |
|----------|------------------------------|------------------------------|------------------------------|-------------------|-------------------|-------------------|
| group    | Week 25                      | Week 26                      | Week 27                      |                   |                   |                   |
| Fanca+/+ | 273.5±235.3<br>(n=4)         | 191.0±175.4<br>(n=4)         | 57.3±50.1<br>(n=4)           |                   |                   |                   |
| Fanca+/- | 5.0±6.6<br>(n=4)<br>p=0.0375 | 6.0±7.1<br>(n=4)<br>p=0.0527 | 3.0±3.8<br>(n=4)<br>p=0.0474 |                   |                   |                   |
| Fanca-/- | 0.0±0.0<br>(n=4)<br>p=0.0345 | 0.0±0.0<br>(n=4)<br>p=0.0461 | 0.0±0.0<br>(n=4)<br>p=0.0375 |                   |                   |                   |

**Supplemental Table 7. Analysis of non-adherent cells per flask from LTBMCs from Fanca<sup>-/-</sup> mice (x 1000000).** Data are summarized with mean  $\pm$  standard deviation, and p-values are for the comparison of the corresponding group versus the Fanca<sup>+/+</sup> group using ANOVA followed by Dunnett's tests. For those weeks where the ANOVA F-test is not significant, the three groups don't have significant difference, and Dunnett's tests are not necessary, so p-values are not shown for these weeks.

| group                | Week 1                             | Week 2                             | Week 3                             | Week 4                             | Week 5                             | Week 6                             |
|----------------------|------------------------------------|------------------------------------|------------------------------------|------------------------------------|------------------------------------|------------------------------------|
| Fanca <sup>+/+</sup> | 2.3 $\pm$ 0.5<br>(n=4)             | 1.4 $\pm$ 0.3<br>(n=4)             | 0.9 $\pm$ 0.1<br>(n=4)             | 1.1 $\pm$ 0.1<br>(n=4)             | 1.6 $\pm$ 0.5<br>(n=4)             | 1.3 $\pm$ 0.4<br>(n=4)             |
| Fanca <sup>+/-</sup> | 1.9 $\pm$ 0.4<br>(n=4)<br>p=0.2503 | 0.4 $\pm$ 0.1<br>(n=4)<br>p<0.0001 | 0.4 $\pm$ 0.0<br>(n=4)<br>p<0.0001 | 0.6 $\pm$ 0.1<br>(n=4)<br>p<0.0001 | 1.3 $\pm$ 0.2<br>(n=4)             | 0.9 $\pm$ 0.3<br>(n=4)<br>p=0.2055 |
| Fanca <sup>-/-</sup> | 1.1 $\pm$ 0.2<br>(n=4)<br>p=0.0027 | 0.3 $\pm$ 0.0<br>(n=4)<br>p<0.0001 | 0.3 $\pm$ 0.0<br>(n=4)<br>p<0.0001 | 0.6 $\pm$ 0.1<br>(n=4)<br>p<0.0001 | 1.1 $\pm$ 0.2<br>(n=4)             | 0.6 $\pm$ 0.2<br>(n=4)<br>p=0.0249 |
| group                | Week 7                             | Week 8                             | Week 9                             | Week 10                            | Week 11                            | Week 12                            |
| Fanca <sup>+/+</sup> | 0.9 $\pm$ 0.2<br>(n=4)             | 0.9 $\pm$ 0.3<br>(n=4)             | 0.9 $\pm$ 0.3<br>(n=4)             | 1.1 $\pm$ 0.6<br>(n=4)             | 0.8 $\pm$ 0.3<br>(n=4)             | 0.8 $\pm$ 0.3<br>(n=4)             |
| Fanca <sup>+/-</sup> | 0.5 $\pm$ 0.0<br>(n=4)<br>p=0.0024 | 0.5 $\pm$ 0.1<br>(n=4)<br>p=0.0376 | 0.4 $\pm$ 0.1<br>(n=4)<br>p=0.0065 | 0.5 $\pm$ 0.1<br>(n=4)<br>p=0.0624 | 0.5 $\pm$ 0.2<br>(n=4)<br>p=0.1516 | 0.7 $\pm$ 0.5<br>(n=4)<br>p=0.9391 |
| Fanca <sup>-/-</sup> | 0.4 $\pm$ 0.0<br>(n=4)<br>p=0.0004 | 0.3 $\pm$ 0.0<br>(n=4)<br>p=0.0020 | 0.3 $\pm$ 0.1<br>(n=4)<br>p=0.0015 | 0.2 $\pm$ 0.1<br>(n=4)<br>p=0.0087 | 0.1 $\pm$ 0.0<br>(n=4)<br>p=0.0024 | 0.1 $\pm$ 0.0<br>(n=4)<br>p=0.0302 |
| group                | Week 13                            | Week 14                            | Week 15                            | Week 16                            | Week 17                            | Week 18                            |
| Fanca <sup>+/+</sup> | 0.5 $\pm$ 0.2<br>(n=4)             | 0.5 $\pm$ 0.2<br>(n=4)             | 0.5 $\pm$ 0.2<br>(n=4)             | 0.4 $\pm$ 0.2<br>(n=4)             | 0.2 $\pm$ 0.1<br>(n=4)             | 0.3 $\pm$ 0.1<br>(n=4)             |
| Fanca <sup>+/-</sup> | 0.5 $\pm$ 0.2<br>(n=4)<br>p=0.9983 | 0.5 $\pm$ 0.2<br>(n=4)<br>p=0.9954 | 0.4 $\pm$ 0.2<br>(n=4)<br>p=0.8457 | 0.2 $\pm$ 0.1<br>(n=4)<br>p=0.1187 | 0.2 $\pm$ 0.1<br>(n=4)<br>p=0.7228 | 0.2 $\pm$ 0.1<br>(n=4)<br>p=0.5016 |
| Fanca <sup>-/-</sup> | 0.1 $\pm$ 0.0<br>(n=4)<br>p=0.0031 | 0.1 $\pm$ 0.0<br>(n=3)<br>p=0.0218 | 0.0 $\pm$ 0.0<br>(n=3)<br>p=0.0238 | 0.0 $\pm$ 0.0<br>(n=3)<br>p=0.0108 | 0.0 $\pm$ 0.0<br>(n=3)<br>p=0.0295 | 0.0 $\pm$ 0.0<br>(n=3)<br>p=0.0198 |
| group                | Week 19                            | Week 20                            | Week 21                            | Week 22                            | Week 23                            | Week 24                            |
| Fanca <sup>+/+</sup> | 0.3 $\pm$ 0.2<br>(n=4)             | 0.3 $\pm$ 0.2<br>(n=4)             | 0.4 $\pm$ 0.2<br>(n=4)             | 0.4 $\pm$ 0.2<br>(n=4)             | 0.5 $\pm$ 0.3<br>(n=4)             | 0.5 $\pm$ 0.4<br>(n=4)             |
| Fanca <sup>+/-</sup> | 0.2 $\pm$ 0.1<br>(n=4)             | 0.1 $\pm$ 0.1<br>(n=4)             | 0.1 $\pm$ 0.1<br>(n=4)             | 0.2 $\pm$ 0.2<br>(n=4)             | 0.1 $\pm$ 0.0<br>(n=4)             | 0.1 $\pm$ 0.1<br>(n=4)             |

|          |                              |                  |                              |                              |                              |                              |
|----------|------------------------------|------------------|------------------------------|------------------------------|------------------------------|------------------------------|
|          | p=0.2622                     |                  | p=0.0234                     | p=0.1323                     | p=0.0125                     | p=0.0647                     |
| Fanca-/- | 0.0±0.0<br>(n=3)<br>p=0.0133 | 0.0±0.0<br>(n=3) | 0.0±0.0<br>(n=3)<br>p=0.0064 | 0.0±0.0<br>(n=3)<br>p=0.0181 | 0.0±0.0<br>(n=3)<br>p=0.0080 | 0.0±0.0<br>(n=3)<br>p=0.0386 |
| group    | <b>Week 25</b>               | <b>Week 26</b>   | <b>Week 27</b>               |                              |                              |                              |
| Fanca+/+ | 0.5±0.4<br>(n=4)             | 0.3±0.2<br>(n=4) | 0.2±0.1<br>(n=4)             |                              |                              |                              |
| Fanca+/- | 0.1±0.1<br>(n=4)             | 0.1±0.0<br>(n=4) | 0.1±0.0<br>(n=4)<br>p=0.0357 |                              |                              |                              |
| Fanca-/- | 0.0±0.0<br>(n=3)             | 0.0±0.0<br>(n=3) | 0.0±0.0<br>(n=3)<br>p=0.0008 |                              |                              |                              |

### Supplemental Table 8. Analysis of percent confluence in LTBMCs from Fanca<sup>-/-</sup> mice.

Data are summarized with mean  $\pm$  standard deviation, and p-values are for the comparison of the corresponding group versus the Fanca<sup>+/+</sup> group using ANOVA followed by Dunnett's tests. For those weeks where the ANOVA F-test is not significant, the three groups don't have significant difference, and Dunnett's tests are not necessary, so p-values are not shown for these weeks.

| group                | Week 1                              | Week 2                              | Week 3                              | Week 4                  | Week 5                              | Week 6                  |
|----------------------|-------------------------------------|-------------------------------------|-------------------------------------|-------------------------|-------------------------------------|-------------------------|
| Fanca <sup>+/+</sup> | 27.5 $\pm$ 2.0<br>(n=4)             | 49.4 $\pm$ 1.3<br>(n=4)             | 48.1 $\pm$ 2.4<br>(n=4)             | 45.0 $\pm$ 0.0<br>(n=4) | 73.8 $\pm$ 1.4<br>(n=4)             | 81.9 $\pm$ 2.4<br>(n=4) |
| Fanca <sup>+/-</sup> | 21.9 $\pm$ 2.4<br>(n=4)<br>p=0.0059 | 41.3 $\pm$ 2.5<br>(n=4)<br>p=0.0022 | 44.4 $\pm$ 2.4<br>(n=4)<br>p=0.0558 | 41.3 $\pm$ 3.2<br>(n=4) | 73.8 $\pm$ 1.4<br>(n=4)<br>p=1.0000 | 78.1 $\pm$ 2.4<br>(n=4) |
| Fanca <sup>-/-</sup> | 21.3 $\pm$ 1.4<br>(n=4)<br>p=0.0031 | 41.3 $\pm$ 3.2<br>(n=4)<br>p=0.0022 | 43.1 $\pm$ 1.3<br>(n=4)<br>p=0.0145 | 43.1 $\pm$ 3.8<br>(n=4) | 70.6 $\pm$ 1.2<br>(n=4)<br>p=0.0197 | 78.1 $\pm$ 3.1<br>(n=4) |
| group                | Week 7                              | Week 8                              | Week 9                              | Week 10                 | Week 11                             | Week 12                 |
| Fanca <sup>+/+</sup> | 92.5 $\pm$ 0.0<br>(n=4)             | 95.0 $\pm$ 0.0<br>(n=4)             | 95.0 $\pm$ 0.0<br>(n=4)             | 95.0 $\pm$ 0.0<br>(n=4) | 95.0 $\pm$ 0.0<br>(n=4)             | 95.0 $\pm$ 0.0<br>(n=4) |
| Fanca <sup>+/-</sup> | 92.5 $\pm$ 2.9<br>(n=4)             | 95.0 $\pm$ 0.0<br>(n=4)             | 95.0 $\pm$ 0.0<br>(n=4)             | 95.0 $\pm$ 0.0<br>(n=4) | 95.0 $\pm$ 0.0<br>(n=4)             | 95.0 $\pm$ 0.0<br>(n=4) |
| Fanca <sup>-/-</sup> | 92.5 $\pm$ 2.9<br>(n=4)             | 95.0 $\pm$ 0.0<br>(n=4)             | 95.0 $\pm$ 0.0<br>(n=4)             | 95.0 $\pm$ 0.0<br>(n=4) | 95.0 $\pm$ 0.0<br>(n=4)             | 95.0 $\pm$ 0.0<br>(n=4) |
| group                | Week 13                             | Week 14                             | Week 15                             | Week 16                 | Week 17                             | Week 18                 |
| Fanca <sup>+/+</sup> | 95.0 $\pm$ 0.0<br>(n=4)             | 95.0 $\pm$ 0.0<br>(n=4)             | 95.0 $\pm$ 0.0<br>(n=4)             | 95.0 $\pm$ 0.0<br>(n=4) | 95.0 $\pm$ 0.0<br>(n=4)             | 95.0 $\pm$ 0.0<br>(n=4) |
| Fanca <sup>+/-</sup> | 95.0 $\pm$ 0.0<br>(n=4)             | 95.0 $\pm$ 0.0<br>(n=4)             | 95.0 $\pm$ 0.0<br>(n=4)             | 95.0 $\pm$ 0.0<br>(n=4) | 95.0 $\pm$ 0.0<br>(n=4)             | 95.0 $\pm$ 0.0<br>(n=4) |
| Fanca <sup>-/-</sup> | 95.0 $\pm$ 0.0<br>(n=4)             | 95.0 $\pm$ 0.0<br>(n=3)             | 95.0 $\pm$ 0.0<br>(n=3)             | 95.0 $\pm$ 0.0<br>(n=3) | No data<br>p=NA                     | No data<br>p=NA         |
| group                | Week 19                             | Week 20                             | Week 21                             | Week 22                 | Week 23                             | Week 24                 |
| Fanca <sup>+/+</sup> | 95.0 $\pm$ 0.0<br>(n=4)             | 95.0 $\pm$ 0.0<br>(n=4)             | 95.0 $\pm$ 0.0<br>(n=4)             | 95.0 $\pm$ 0.0<br>(n=4) | 95.0 $\pm$ 0.0<br>(n=4)             | 95.0 $\pm$ 0.0<br>(n=4) |
| Fanca <sup>+/-</sup> | 95.0 $\pm$ 0.0<br>(n=4)             | 95.0 $\pm$ 0.0<br>(n=4)             | 95.0 $\pm$ 0.0<br>(n=4)             | 95.0 $\pm$ 0.0<br>(n=4) | 95.0 $\pm$ 0.0<br>(n=4)             | 95.0 $\pm$ 0.0<br>(n=4) |
| Fanca <sup>-/-</sup> | No data<br>p=NA                     | No data<br>p=NA                     | No data<br>p=NA                     | No data<br>p=NA         | No data<br>p=NA                     | No data<br>p=NA         |
| group                | Week 25                             | Week 26                             | Week 27                             |                         |                                     |                         |



|          |                   |                   |                   |  |  |  |
|----------|-------------------|-------------------|-------------------|--|--|--|
| Fanca+/+ | 95.0±0.0<br>(n=4) | 95.0±0.0<br>(n=4) | 95.0±0.0<br>(n=4) |  |  |  |
| Fanca+/- | 95.0±0.0<br>(n=4) | 95.0±0.0<br>(n=4) | 95.0±0.0<br>(n=4) |  |  |  |
| Fanca-/- | No data<br>p=NA   | No data<br>p=NA   | No data<br>p=NA   |  |  |  |

**Supplemental Table 9. Analysis of day 7 colony forming progenitor cells from Fanca<sup>-/-</sup>**

**LTBMCs.** Data are summarized with mean  $\pm$  standard deviation, and p-values are for the comparison of the corresponding group versus the Fanca<sup>+/+</sup> group using ANOVA followed by Dunnett's tests. For those weeks where the ANOVA F-test is not significant, the three groups don't have significant difference, and Dunnett's tests are not necessary, so p-values are not shown for these weeks.

| group                | Week 1                              | Week 2                              | Week 3                              | Week 4                               | Week 5                              | Week 6                              |
|----------------------|-------------------------------------|-------------------------------------|-------------------------------------|--------------------------------------|-------------------------------------|-------------------------------------|
| Fanca <sup>+/+</sup> | 74.7 $\pm$ 4.2<br>(n=3)             | 24.0 $\pm$ 7.0<br>(n=3)             | 52.7 $\pm$ 3.5<br>(n=3)             | 81.3 $\pm$ 7.5<br>(n=3)              | 23.3 $\pm$ 2.1<br>(n=3)             | 12.0 $\pm$ 3.5<br>(n=3)             |
| Fanca <sup>+/-</sup> | 53.0 $\pm$ 8.9<br>(n=3)<br>p=0.0088 | 21.0 $\pm$ 3.6<br>(n=3)<br>p=0.6588 | 39.3 $\pm$ 1.5<br>(n=3)<br>p=0.0041 | 106.0 $\pm$ 8.9<br>(n=3)<br>p=0.0087 | 72.3 $\pm$ 6.8<br>(n=3)<br>p<0.0001 | 24.3 $\pm$ 4.2<br>(n=3)<br>p=0.0063 |
| Fanca <sup>-/-</sup> | 17.3 $\pm$ 4.0<br>(n=3)<br>p<0.0001 | 2.7 $\pm$ 1.2<br>(n=3)<br>p=0.0023  | 32.3 $\pm$ 4.0<br>(n=3)<br>p=0.0004 | 48.3 $\pm$ 3.2<br>(n=3)<br>p=0.0021  | 12.7 $\pm$ 1.5<br>(n=3)<br>p=0.0366 | 5.3 $\pm$ 1.5<br>(n=3)<br>p=0.0788  |
| group                | Week 7                              | Week 8                              | Week 9                              | Week 11                              | Week 12                             | Week 13                             |
| Fanca <sup>+/+</sup> | 24.0 $\pm$ 2.0<br>(n=3)             | 26.3 $\pm$ 3.8<br>(n=3)             | 19.0 $\pm$ 5.6<br>(n=3)             | 13.0 $\pm$ 5.0<br>(n=3)              | 7.7 $\pm$ 1.5<br>(n=3)              | 12.7 $\pm$ 5.0<br>(n=3)             |
| Fanca <sup>+/-</sup> | 12.3 $\pm$ 3.1<br>(n=3)<br>p=0.0010 | 14.7 $\pm$ 1.2<br>(n=3)<br>p=0.0014 | 46.7 $\pm$ 6.4<br>(n=3)<br>p=0.0008 | 52.3 $\pm$ 3.5<br>(n=3)<br>p<0.0001  | 34.3 $\pm$ 4.0<br>(n=3)<br>p<0.0001 | 38.3 $\pm$ 1.2<br>(n=3)<br>p=0.0001 |
| Fanca <sup>+/+</sup> | 1.3 $\pm$ 0.6<br>(n=3)<br>p<0.0001  | 0.0 $\pm$ 0.0<br>(n=3)<br>p<0.0001  | 0.0 $\pm$ 0.0<br>(n=3)<br>p=0.0055  | 0.0 $\pm$ 0.0<br>(n=3)<br>p=0.0072   | 0.0 $\pm$ 0.0<br>(n=3)<br>p=0.0166  | 0.0 $\pm$ 0.0<br>(n=3)<br>p=0.0036  |
| group                | Week 14                             | Week 15                             | Week 16                             | Week 17                              | Week 18                             | Week 19                             |
| Fanca <sup>+/+</sup> | 9.5 $\pm$ 0.7<br>(n=2)              | 12.0 $\pm$ 1.7<br>(n=3)             | 8.0 $\pm$ 3.0<br>(n=3)              | 13.0 $\pm$ 3.5<br>(n=3)              | 21.7 $\pm$ 1.2<br>(n=3)             | 17.7 $\pm$ 3.8<br>(n=3)             |
| Fanca <sup>+/-</sup> | 38.0 $\pm$ 8.0<br>(n=3)<br>p=0.0028 | 30.3 $\pm$ 2.1<br>(n=3)<br>p<0.0001 | 32.3 $\pm$ 9.7<br>(n=3)<br>p=0.0041 | 25.7 $\pm$ 4.2<br>(n=3)<br>p=0.0046  | 18.3 $\pm$ 3.2<br>(n=3)<br>p=0.1416 | 9.0 $\pm$ 2.6<br>(n=3)<br>p=0.0129  |
| Fanca <sup>-/-</sup> | 0.0 $\pm$ 0.0<br>(n=3)<br>p=0.1532  | 0.0 $\pm$ 0.0<br>(n=3)<br>p=0.0001  | 0.0 $\pm$ 0.0<br>(n=3)<br>p=0.2401  | 0.0 $\pm$ 0.0<br>(n=3)<br>p=0.0040   | 0.0 $\pm$ 0.0<br>(n=3)<br>p<0.0001  | 0.0 $\pm$ 0.0<br>(n=3)<br>p=0.0003  |
| group                | Week 20                             | Week 21                             | Week 22                             | Week 23                              | Week 24                             | Week 25                             |
| Fanca <sup>+/+</sup> | 16.7 $\pm$ 2.1<br>(n=3)             | 15.3 $\pm$ 3.8<br>(n=3)             | 24.7 $\pm$ 7.6<br>(n=3)             | 19.7 $\pm$ 5.8<br>(n=3)              | 17.3 $\pm$ 3.2<br>(n=3)             | 15.7 $\pm$ 1.5<br>(n=3)             |
| Fanca <sup>+/-</sup> | 13.7 $\pm$ 4.0<br>(n=3)             | 5.7 $\pm$ 2.5<br>(n=3)              | 6.3 $\pm$ 0.6<br>(n=3)              | 4.7 $\pm$ 0.6<br>(n=3)               | 2.7 $\pm$ 0.6<br>(n=3)              | 0.3 $\pm$ 0.6<br>(n=3)              |

|          |                              |                              |                              |                              |                              |                              |
|----------|------------------------------|------------------------------|------------------------------|------------------------------|------------------------------|------------------------------|
|          | p=0.3381                     | p=0.0073                     | p=0.0041                     | p=0.0028                     | p=0.0001                     | p<0.0001                     |
| Fanca-/- | 0.0±0.0<br>(n=3)<br>p=0.0004 | 0.0±0.0<br>(n=3)<br>p=0.0007 | 0.0±0.0<br>(n=3)<br>p=0.0009 | 0.0±0.0<br>(n=3)<br>p=0.0007 | 0.0±0.0<br>(n=3)<br>p=0.0001 | 0.0±0.0<br>(n=3)<br>p<0.0001 |
| group    | <b>Week 26</b>               |                              |                              |                              |                              |                              |
| Fanca+/+ | 12.7±2.5<br>(n=3)            |                              |                              |                              |                              |                              |
| Fanca+/- | 0.0±0.0<br>(n=3)<br>p=0.0001 |                              |                              |                              |                              |                              |
| Fanca-/- | 0.0±0.0<br>(n=3)<br>p=0.0001 |                              |                              |                              |                              |                              |

**Supplemental Table 10. Analysis of day 14 colony forming progenitor cells from Fanca<sup>-/-</sup>LTBMCs.** Data are summarized with mean  $\pm$  standard deviation, and p-values are for the comparison of the corresponding group versus the Fanca<sup>+/+</sup> group using ANOVA followed by Dunnett's tests. For those weeks where the ANOVA F-test is not significant, the three groups don't have significant difference, and Dunnett's tests are not necessary, so p-values are not shown for these weeks.

| group                | Week 1                              | Week 2                              | Week 3                              | Week 4                               | Week 5                              | Week 6                              |
|----------------------|-------------------------------------|-------------------------------------|-------------------------------------|--------------------------------------|-------------------------------------|-------------------------------------|
| Fanca <sup>+/+</sup> | 80.7 $\pm$ 2.1<br>(n=3)             | 25.3 $\pm$ 5.7<br>(n=3)             | 49.0 $\pm$ 1.7<br>(n=3)             | 91.7 $\pm$ 3.5<br>(n=3)              | 29.0 $\pm$ 3.6<br>(n=3)             | 14.0 $\pm$ 3.0<br>(n=3)             |
| Fanca <sup>+/-</sup> | 58.0 $\pm$ 9.2<br>(n=3)<br>p=0.0040 | 22.7 $\pm$ 4.2<br>(n=3)<br>p=0.6682 | 53.7 $\pm$ 2.5<br>(n=3)<br>p=0.3361 | 112.0 $\pm$ 8.2<br>(n=3)<br>p=0.0091 | 80.0 $\pm$ 6.0<br>(n=3)<br>p<0.0001 | 35.0 $\pm$ 6.2<br>(n=3)<br>p=0.0013 |
| Fanca <sup>-/-</sup> | 18.3 $\pm$ 0.6<br>(n=3)<br>p<0.0001 | 3.3 $\pm$ 1.5<br>(n=3)<br>p=0.0012  | 33.7 $\pm$ 6.4<br>(n=3)<br>p=0.0065 | 51.7 $\pm$ 4.6<br>(n=3)<br>p=0.0003  | 16.7 $\pm$ 3.8<br>(n=3)<br>p=0.0293 | 5.0 $\pm$ 1.0<br>(n=3)<br>p=0.0595  |
| group                | Week 7                              | Week 8                              | Week 9                              | Week 11                              | Week 12                             | Week 13                             |
| Fanca <sup>+/+</sup> | 26.3 $\pm$ 2.1<br>(n=3)             | 30.7 $\pm$ 5.7<br>(n=3)             | 22.3 $\pm$ 4.5<br>(n=3)             | 20.0 $\pm$ 8.2<br>(n=3)              | 10.0 $\pm$ 1.0<br>(n=3)             | 16.7 $\pm$ 4.6<br>(n=3)             |
| Fanca <sup>+/-</sup> | 14.3 $\pm$ 2.9<br>(n=3)<br>p=0.0007 | 17.0 $\pm$ 3.6<br>(n=3)<br>p=0.0097 | 49.3 $\pm$ 6.7<br>(n=3)<br>p=0.0007 | 54.0 $\pm$ 7.5<br>(n=3)<br>p=0.0012  | 39.3 $\pm$ 2.3<br>(n=3)<br>p<0.0001 | 49.7 $\pm$ 2.1<br>(n=3)<br>p<0.0001 |
| Fanca <sup>-/-</sup> | 1.7 $\pm$ 0.6<br>(n=3)<br>p<0.0001  | 0.7 $\pm$ 1.2<br>(n=3)<br>p=0.0002  | 0.0 $\pm$ 0.0<br>(n=3)<br>p=0.0019  | 0.0 $\pm$ 0.0<br>(n=3)<br>p=0.0157   | 0.0 $\pm$ 0.0<br>(n=3)<br>p=0.0003  | 0.0 $\pm$ 0.0<br>(n=3)<br>p=0.0008  |
| group                | Week 14                             | Week 15                             | Week 16                             | Week 17                              | Week 18                             | Week 19                             |
| Fanca <sup>+/+</sup> | 13.0 $\pm$ 1.4<br>(n=2)             | 15.3 $\pm$ 1.5<br>(n=3)             | 8.7 $\pm$ 4.0<br>(n=3)              | 14.0 $\pm$ 3.6<br>(n=3)              | 23.3 $\pm$ 0.6<br>(n=3)             | 20.3 $\pm$ 5.5<br>(n=3)             |
| Fanca <sup>+/-</sup> | 45.7 $\pm$ 5.9<br>(n=3)<br>p=0.0004 | 36.3 $\pm$ 5.1<br>(n=3)<br>p=0.0003 | 40.0 $\pm$ 8.0<br>(n=3)<br>p=0.0006 | 32.0 $\pm$ 4.0<br>(n=3)<br>p=0.0007  | 26.3 $\pm$ 2.9<br>(n=3)<br>p=0.1254 | 9.0 $\pm$ 2.6<br>(n=3)<br>p=0.0136  |
| Fanca <sup>-/-</sup> | 0.0 $\pm$ 0.0<br>(n=3)<br>p=0.0215  | 0.0 $\pm$ 0.0<br>(n=3)<br>p=0.0016  | 0.0 $\pm$ 0.0<br>(n=3)<br>p=0.1453  | 0.0 $\pm$ 0.0<br>(n=3)<br>p=0.0027   | 0.0 $\pm$ 0.0<br>(n=3)<br>p<0.0001  | 0.0 $\pm$ 0.0<br>(n=3)<br>p=0.0007  |
| group                | Week 20                             | Week 21                             | Week 22                             | Week 23                              | Week 24                             | Week 25                             |
| Fanca <sup>+/+</sup> | 17.7 $\pm$ 0.6<br>(n=3)             | 18.3 $\pm$ 6.1<br>(n=3)             | 27.0 $\pm$ 7.2<br>(n=3)             | 23.3 $\pm$ 5.0<br>(n=3)              | 22.3 $\pm$ 5.5<br>(n=3)             | 19.3 $\pm$ 1.5<br>(n=3)             |
| Fanca <sup>+/-</sup> | 13.7 $\pm$ 4.0<br>(n=3)             | 7.3 $\pm$ 2.1<br>(n=3)              | 6.3 $\pm$ 1.2<br>(n=3)              | 5.3 $\pm$ 1.5<br>(n=3)               | 4.0 $\pm$ 1.7<br>(n=3)              | 1.0 $\pm$ 1.0<br>(n=3)              |

|          |                              |                              |                              |                              |                              |                              |
|----------|------------------------------|------------------------------|------------------------------|------------------------------|------------------------------|------------------------------|
|          | p=0.1401                     | p=0.0198                     | p=0.0017                     | p=0.0006                     | p=0.0009                     | p<0.0001                     |
| Fanca-/- | 0.0±0.0<br>(n=3)<br>p=0.0002 | 0.0±0.0<br>(n=3)<br>p=0.0017 | 0.0±0.0<br>(n=3)<br>p=0.0004 | 0.0±0.0<br>(n=3)<br>p=0.0001 | 0.0±0.0<br>(n=3)<br>p=0.0003 | 0.0±0.0<br>(n=3)<br>p<0.0001 |

**Supplemental Figure 1: Hematopoiesis in *Fancg*<sup>-/-</sup> LTBMCS.** A) Percent of surface area of long-term marrow culture flasks confluent with adherent cells; B) Number of cobblestone islands (adherent hematopoietic cell islands of greater or equal to 50 cells per island) on surface adherent layer of long-term marrow cultures scored weekly; C) Cumulative production of cobblestone islands; D) Weekly production of non-adherent cells per flask; E) Cumulative production of non-adherent cells per flask; F) Weekly production of day 7 colony forming CFU-GEMM non-adherent cells; G) Cumulative production of day 7 colony forming CFU-GEMM non-adherent cells; H) Weekly production of non-adherent cells forming day 14 CFU-GEMM colonies in semisolid medium.

**Supplemental Fig. 1A. *Fancg* LTBMCS**

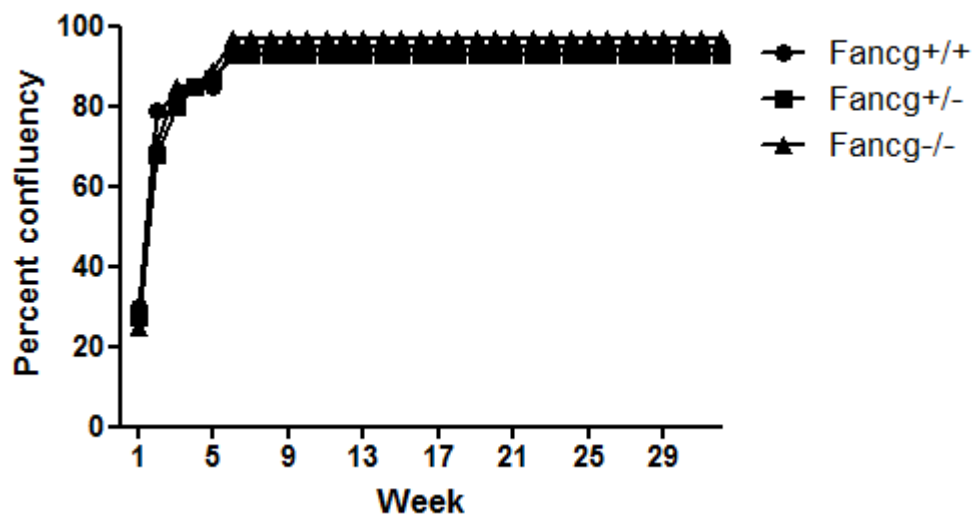

Supplemental Fig. 1B.

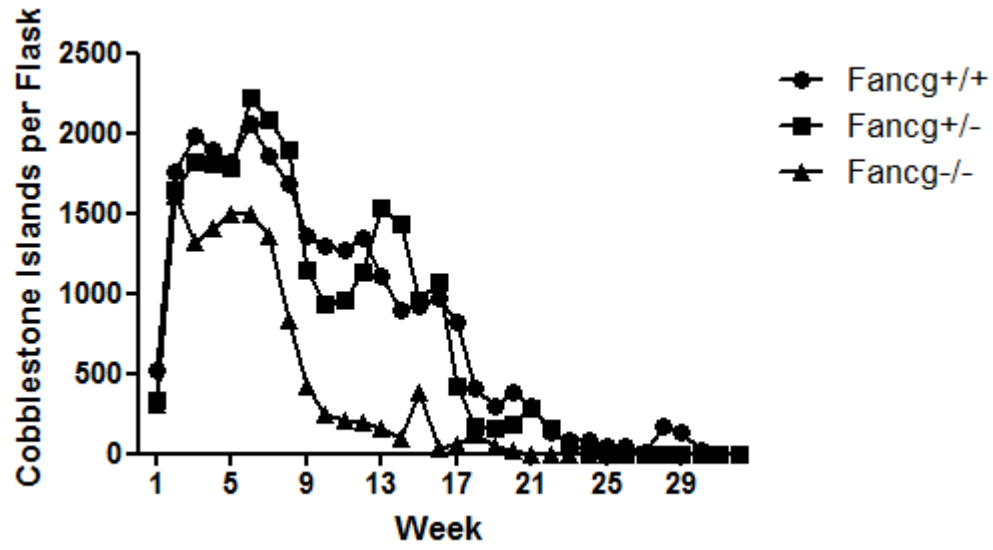

Supplemental Fig. 1C.

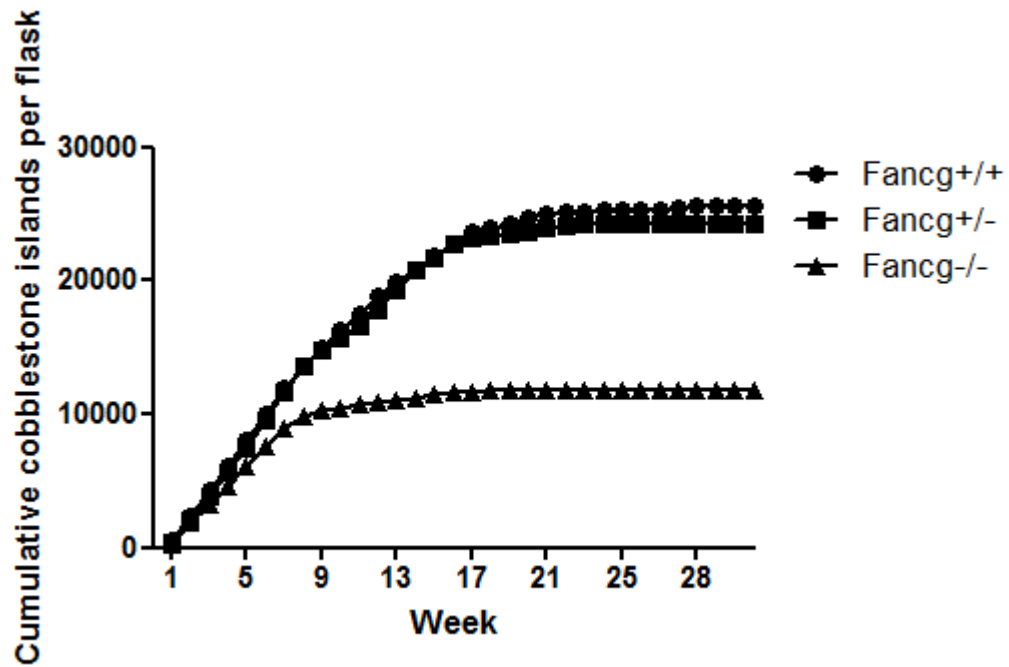

Supplemental Fig. 1D

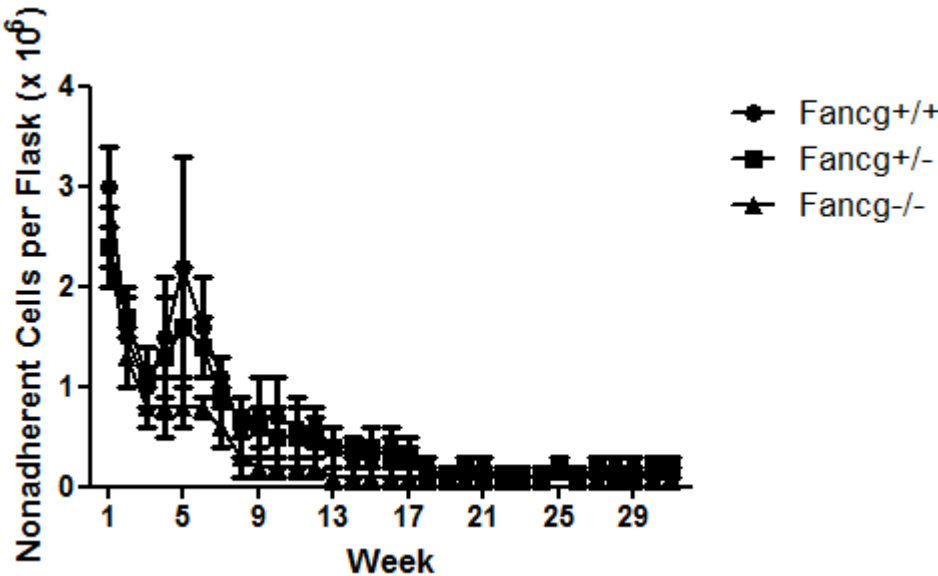

Supplemental Fig. 1E.

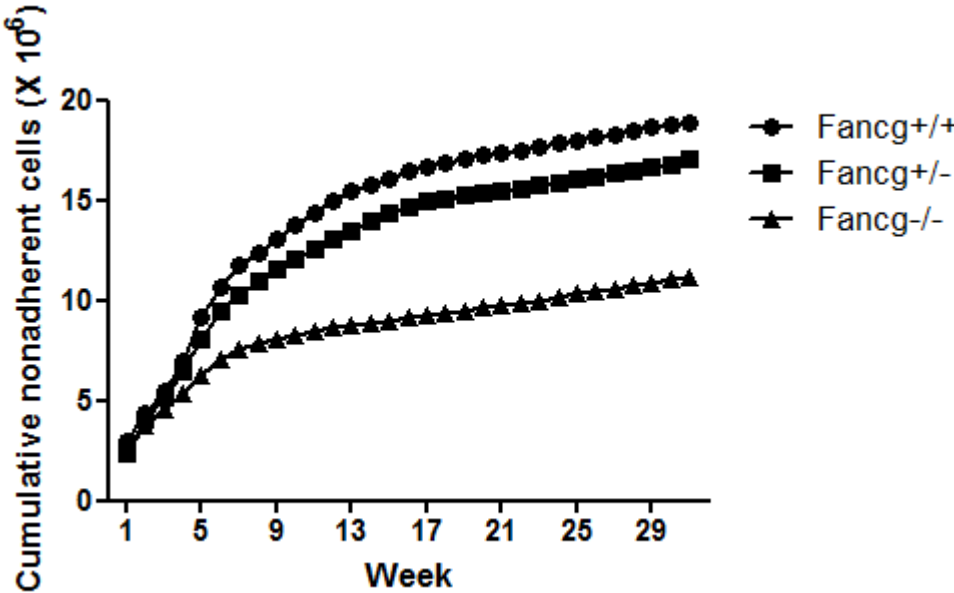



Supplemental Fig. 1F.

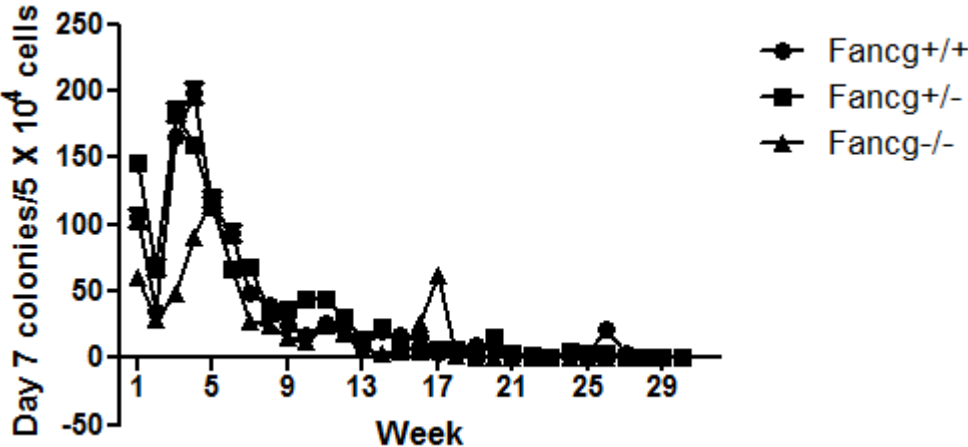

Supplemental Fig. 1G.

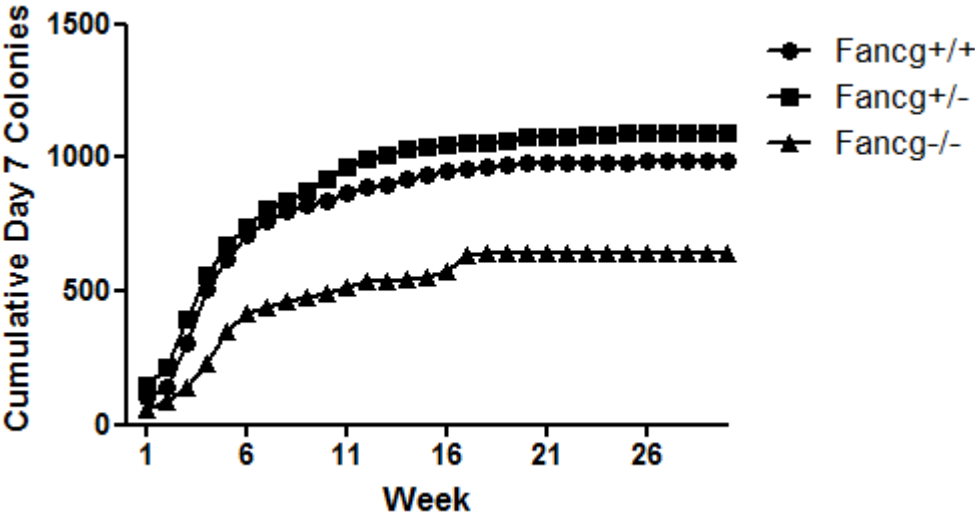

Supplemental Fig. 1H.

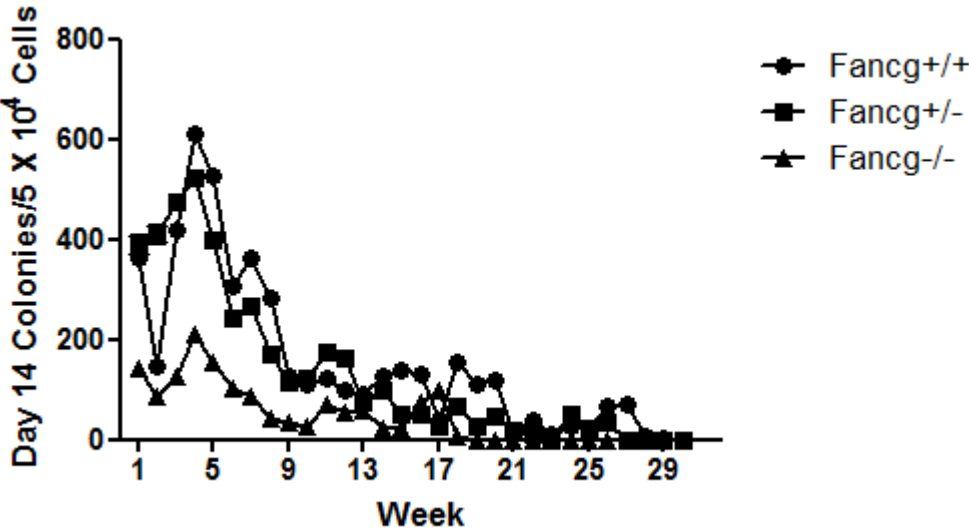

**Supplemental Fig. 2: Hematopoiesis in *Fanca*<sup>-/-</sup> LTBMCs.** **A)** Percent of surface area of long-term marrow culture flasks confluent with adherent cells; **B)** Number of cobblestone islands (adherent hematopoietic cell islands of greater or equal to 50 cells per island) on surface adherent layer of long-term marrow cultures scored weekly; **C)** Cumulative production of cobblestone islands; **D)** Weekly production of non-adherent cells per flask; **E)** Cumulative production of non-adherent cells per flask; **F)** Weekly production of day 7 colony forming CFU-GEMM non-adherent cells; **G)** Cumulative production of day 7 colony forming CFU-GEMM non-adherent cells; **H)** Weekly production of non-adherent cells forming day 14 CFU-GEMM colonies in semisolid medium.

**Supplemental Fig. 2A.**

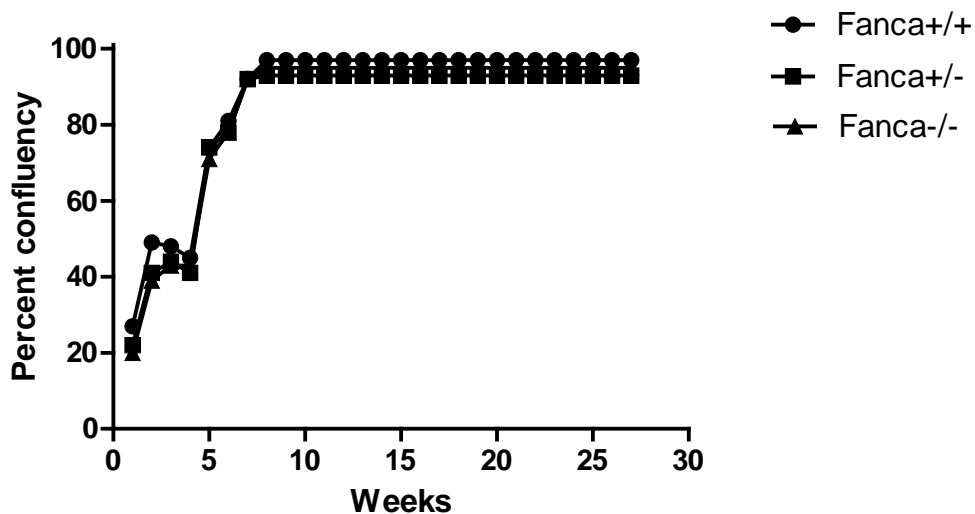

Supplemental Fig. 2B.

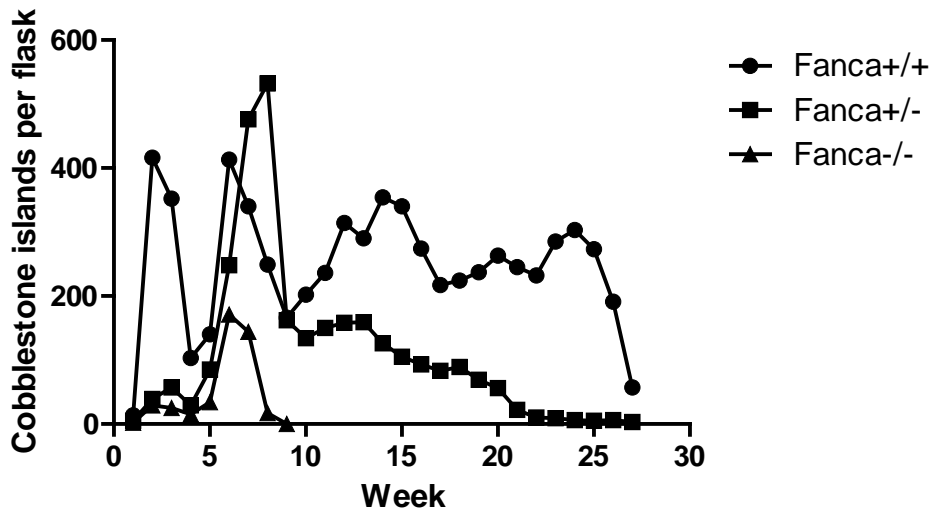

Supplemental Fig. 2C.

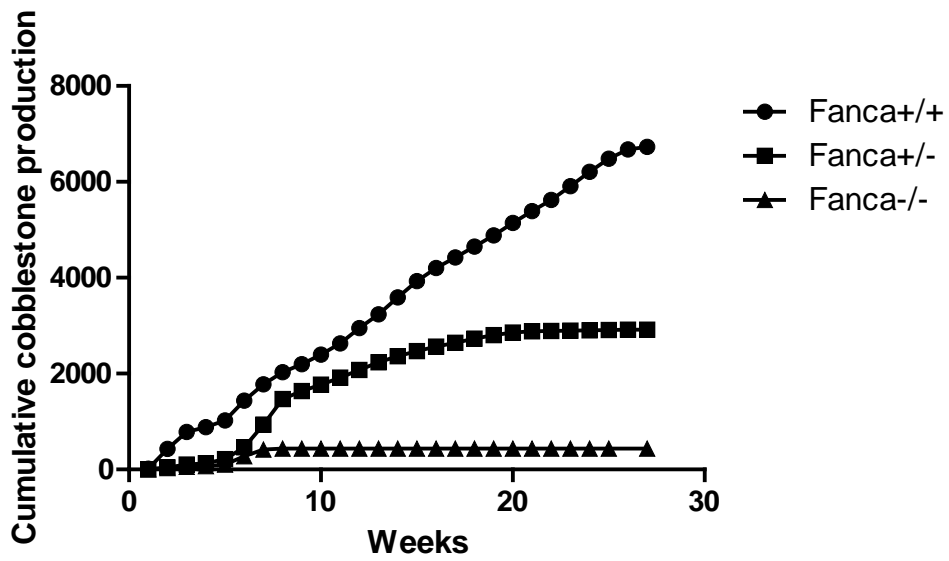

Supplemental Fig. 2D.

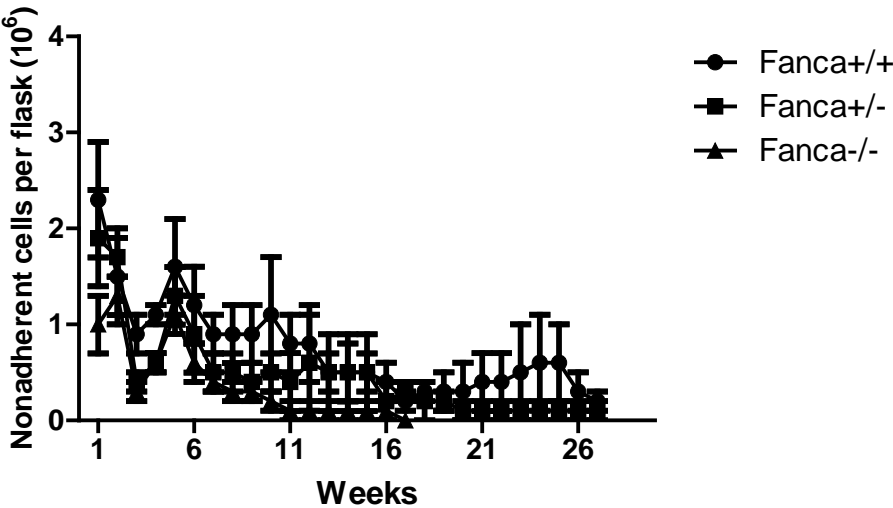

Supplemental Fig. 2E.

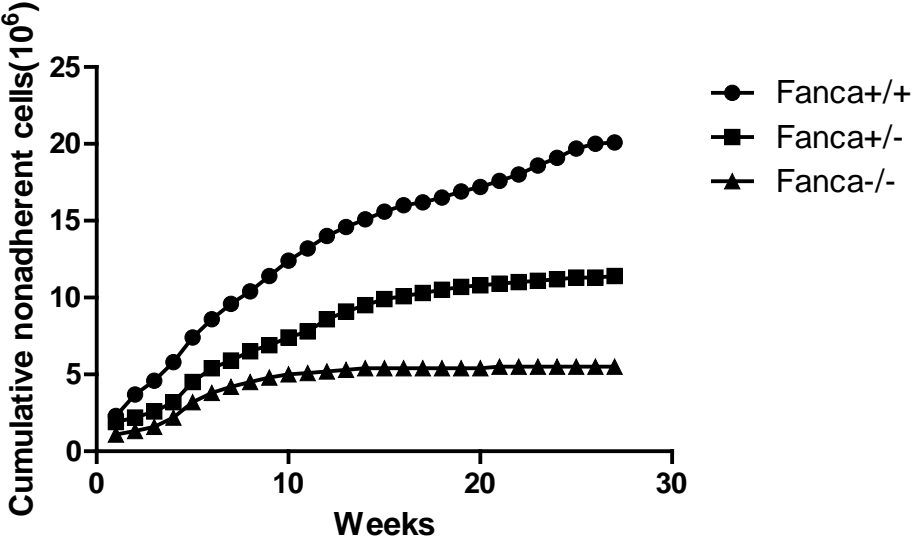

Supplemental Fig. 2F.

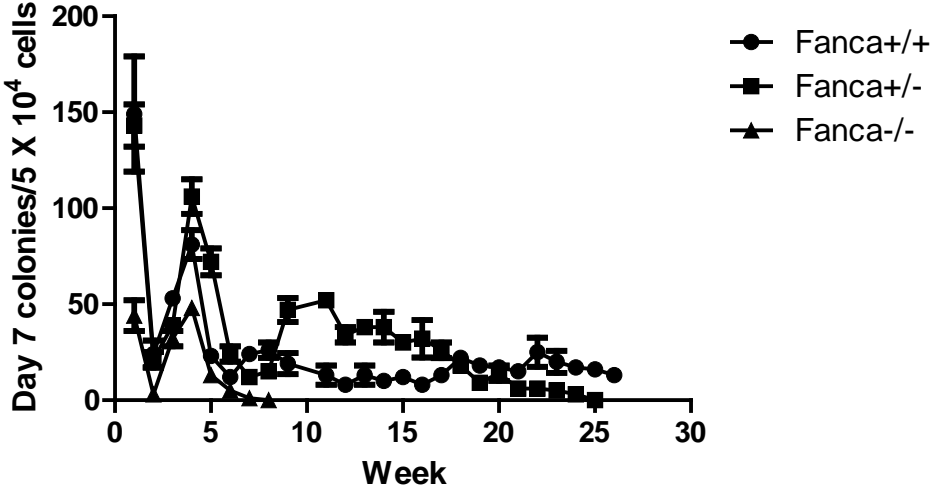

Supplemental Fig. 2G.

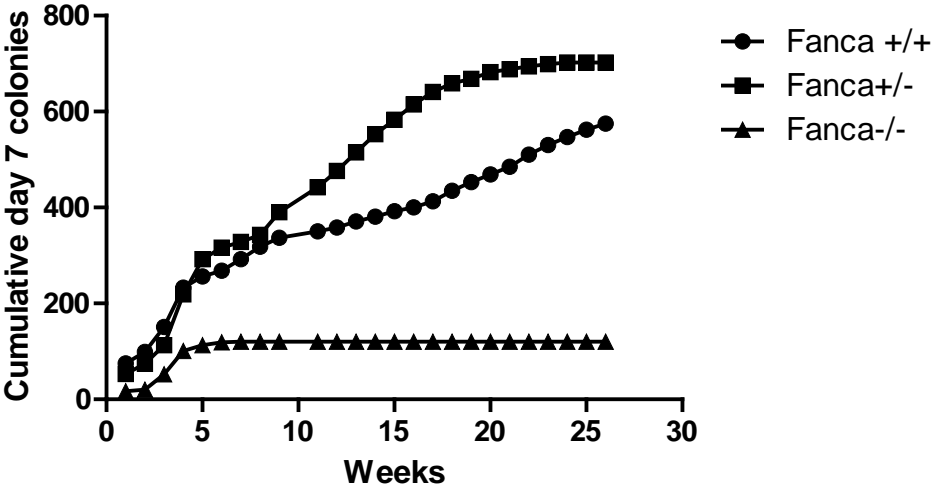

Supplemental Fig. 2H.

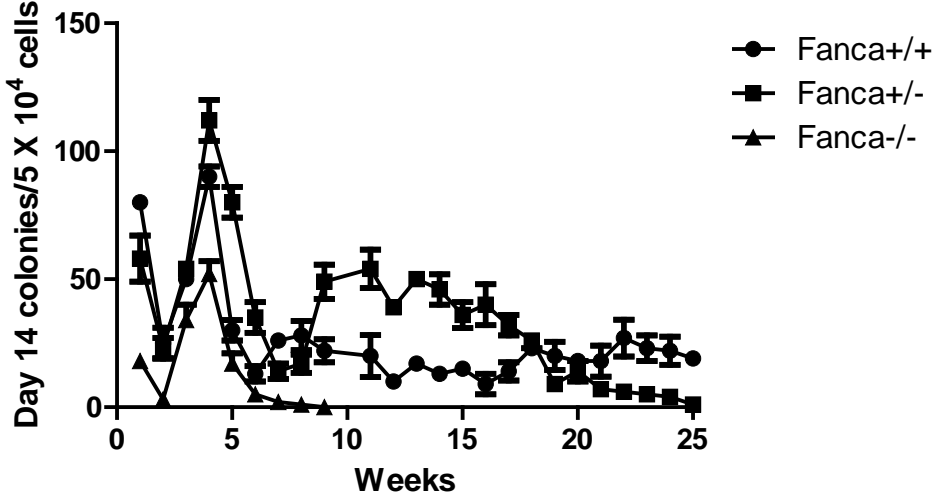

**Supplemental Figure 3:** Radiation survival curves were performed with *Fancg*<sup>-/-</sup> and *Fanca*<sup>-/-</sup> mouse derived clonal interleukin-3 dependent hematopoietic progenitor cell lines derived from the non-adherent cells harvested at week 2 from long-term bone marrow cultures of each genotype and clonal sublines prepared according to published methods (13) and fresh bone marrow removed from adult female mice of each genotype using single cell suspensions plated in semisolid medium culture for the CFU-GEMM assay (Colony Forming Unit-Granulocyte/Megakaryocyte/Macrophage/Erythroid). All colonies of  $\geq 50$  cells were scored at day 7 after plating. **A-B)** IL-3 dependent hematopoietic progenitor cell lines; and **C-D)** Fresh bone marrow.

The analysis of data shown in Table 1. There was radioresistance of both *Fancg*<sup>-/-</sup> and *Fanca*<sup>-/-</sup> IL-3 dependent cell lines (Supplemental Figs. 3A and 3B) and fresh marrow (Supplemental Figs. 3C and 3D) compared to *Fancg*<sup>+/+</sup> and *Fanca*<sup>+/+</sup> genotype specimens tested (Table 1).



Supplemental Fig. 3A: Radiation survival curves of IL-3 dependent hematopoietic progenitor cell lines from *Fancg*<sup>-/-</sup> mice.

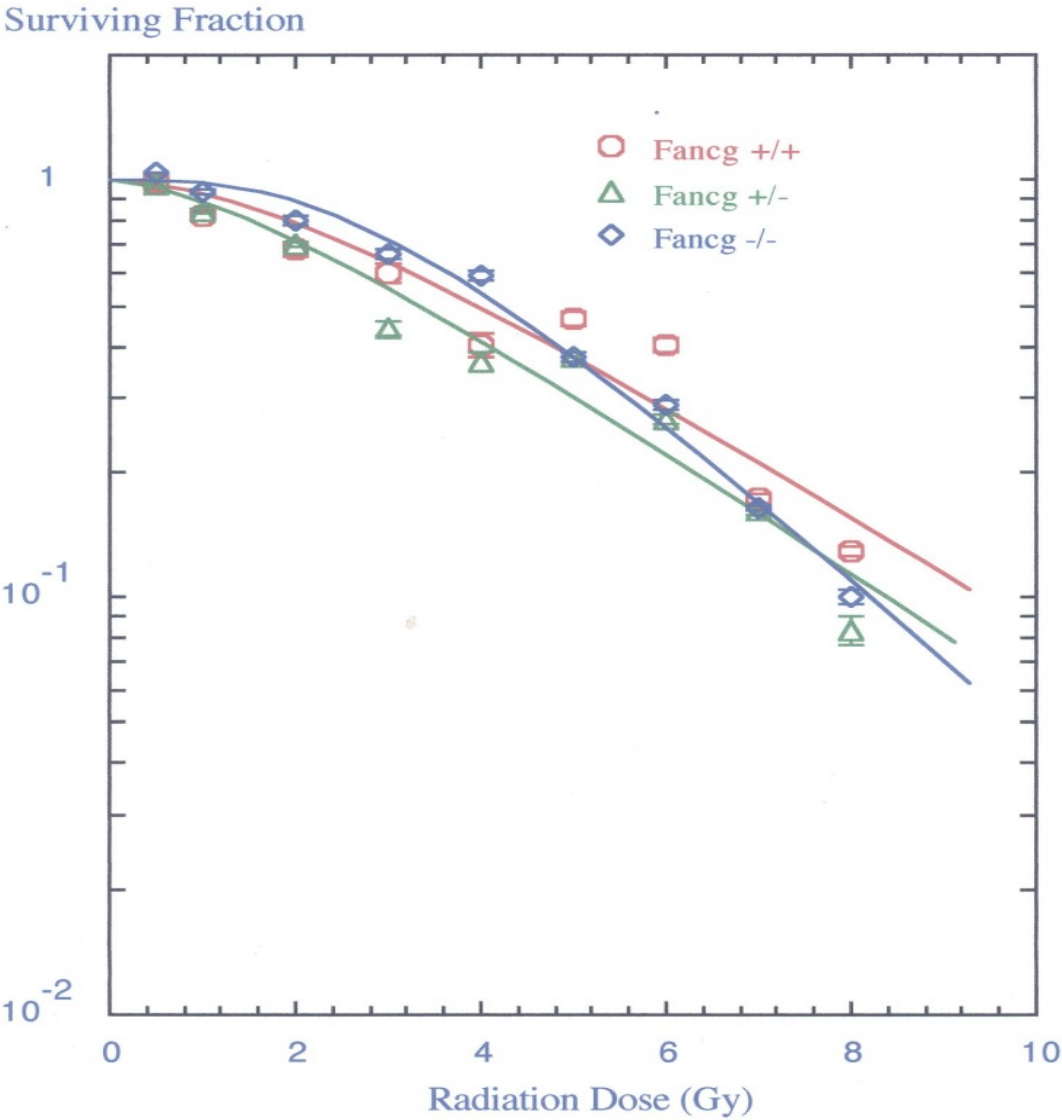

Supplemental Figure 3B: Radiation survival curve of IL-3 dependent hematopoietic progenitor cell lines from *Fanca*<sup>-/-</sup> mice.

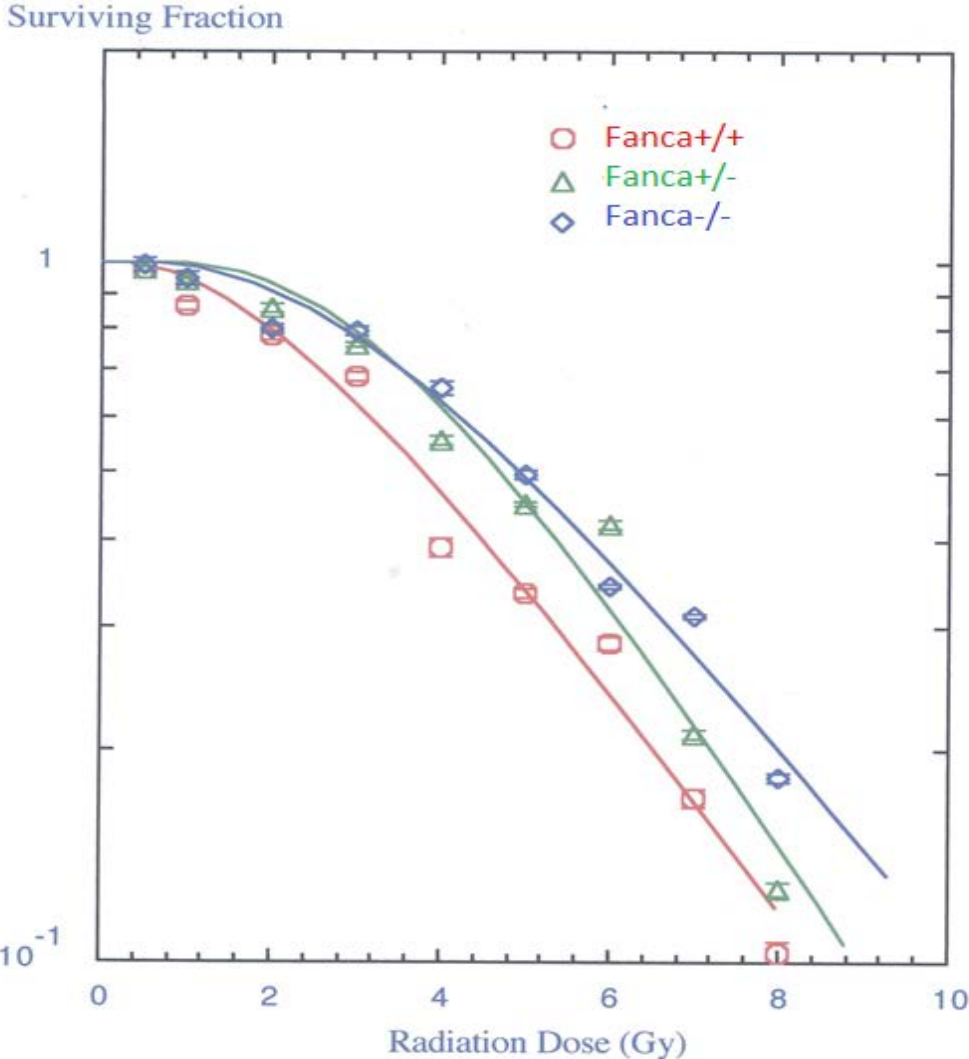

**Supplemental Fig. 3C: Radiation survival curves of fresh marrow hematopoietic colony forming cells from *Fancg*<sup>-/-</sup> mice.**

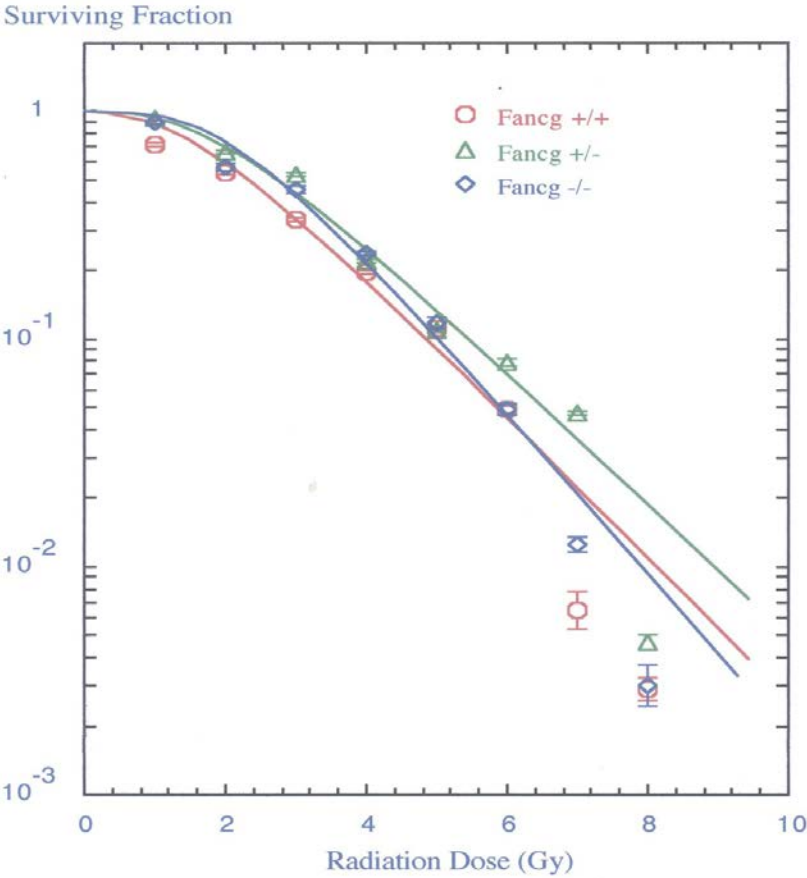

**Supplemental Fig. 3D: Radiation survival curves of fresh bone marrow hematopoietic colony forming cells from Fanca<sup>-/-</sup> mice.**

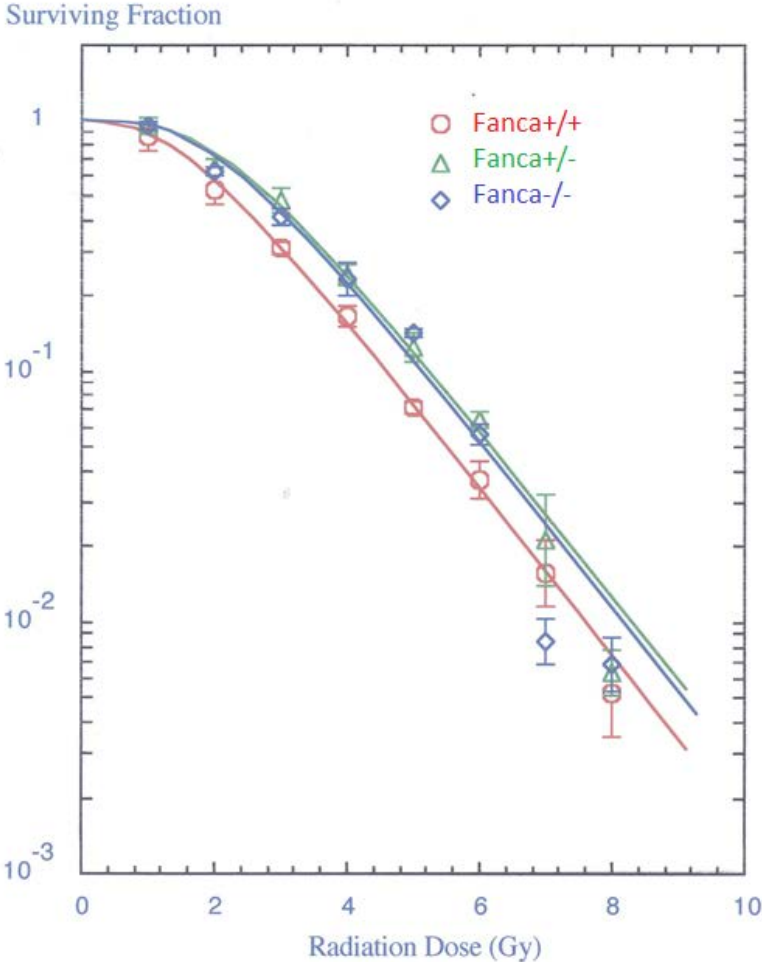

## Supplemental Figure 4A: Densitometry for Fancg Bone Marrow Stromal Cell Western

Blot Shown in Figure 10A.

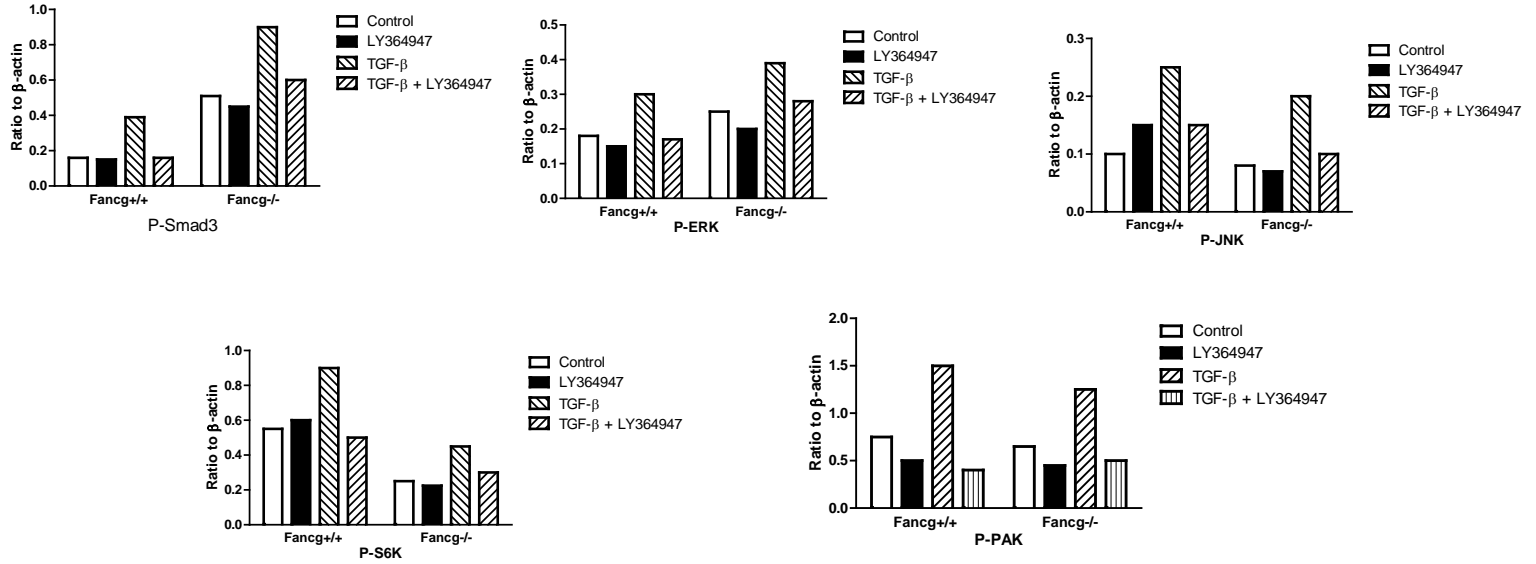

## Supplemental Figure 4B: Densitometry for Fanca Bone Marrow Stromal Cell Western

Blot Shown in Figure 10B.

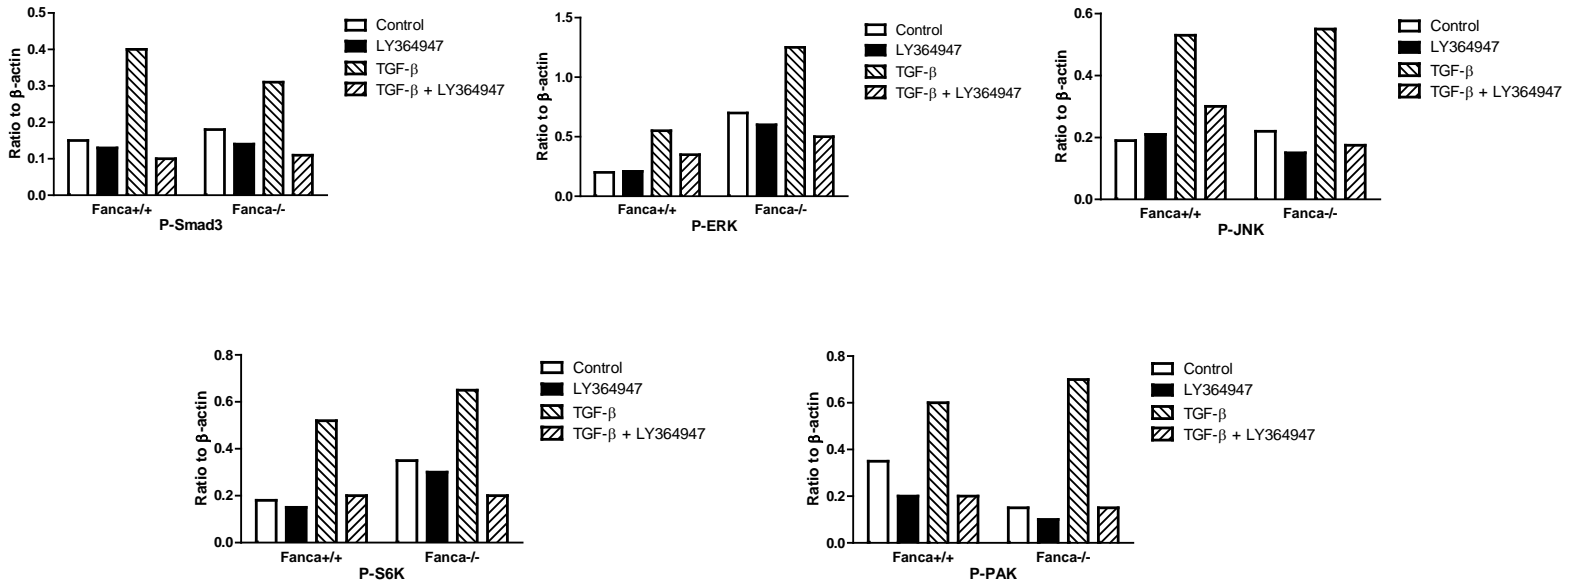

### Supplemental Figure 4C: Densitometry of Fanca Bone Marrow Shown in Figure 10C.

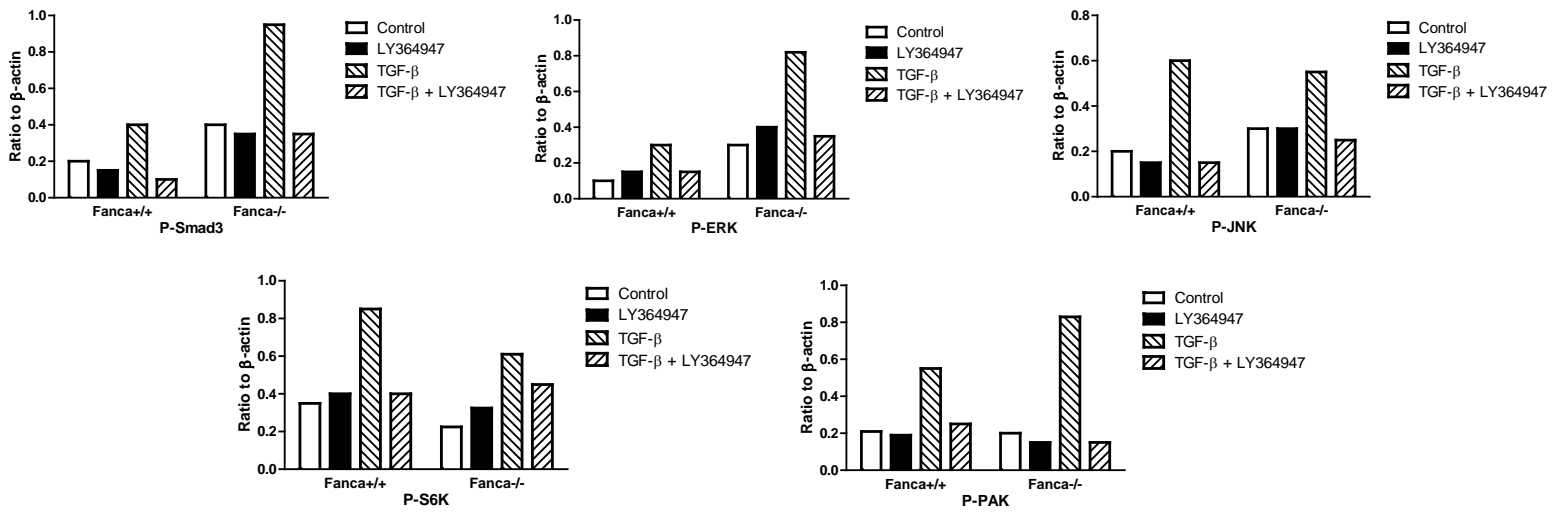

Supplement: NIHMS969900-supplement-Suppemententary_file.pdf [file NIHMS969900-supplement-Suppemententary_file.pdf]
